# Supplementary material for: A Topological Cluster of Differentially Regulated Genes in Mice Lacking PER3
Source: Front Mol Neurosci. 2020 Feb 13;13:15. doi: 10.3389/fnmol.2020.00015 (PMC7031657; doi:10.3389/fnmol.2020.00015)
Supplement: Supplementary file 4 [file Table_4.XLSX]

## Sheet: enrichment_results_wg_result156
Data file S4. Significant biological processes and molecular functions (FDR<0.05) for differentially expressed genes in the eye.
geneSet	description	link	size	overlap	expect	enrichmentRatio	pValue	FDR	userId
GO:0008395	steroid hydroxylase activity	http://amigo.geneontology.org/amigo/term/GO:0008395	65	7	0.470771	14.8692	4.41e-07	0.00478666	Cyp1a1;Cyp2e1;Cyp2b9;Cyp3a25;Cyp2b13;Cyp2j5;Cyp7a1
GO:0009617	response to bacterium	http://amigo.geneontology.org/amigo/term/GO:0009617	674	18	4.88153	3.68737	1.86e-06	0.00726009	Cfd;Gzma;Ltf;Tnfrsf14;Hp;Pck1;Cyp1a1;Cyp2e1;Defb41;Reg3g;Cyp3a25;Il1f6;Macrod2;Pde4d;C3;Reg4;Pde4b;Fabp4
GO:0030595	leukocyte chemotaxis	http://amigo.geneontology.org/amigo/term/GO:0030595	200	10	1.44853	6.90357	2.01e-06	0.00726009	Cxcr2;Fpr2;Cxcl17;S100a9;Il1f6;Kit;Pde4d;Pde4b;Ccr2;Wnk1
GO:0050900	leukocyte migration	http://amigo.geneontology.org/amigo/term/GO:0050900	315	12	2.28143	5.25986	3.23e-06	0.00875504	Cxcr2;Tnfrsf14;Fpr2;Cxcl17;S100a9;Il1f6;Kit;Pde4d;Itga6;Pde4b;Ccr2;Wnk1
GO:0016712	oxidoreductase activity, acting on paired donors, with incorporation or reduction of molecular oxygen, reduced flavin or flavoprotein as one donor, and incorporation of one atom of oxygen	http://amigo.geneontology.org/amigo/term/GO:0016712	60	6	0.434558	13.8071	4.71e-06	0.010216	Cyp1a1;Cyp2e1;Cyp2b9;Cyp3a25;Cyp2b13;Cyp2j5
GO:0097529	myeloid leukocyte migration	http://amigo.geneontology.org/amigo/term/GO:0097529	187	9	1.35437	6.64515	9.02e-06	0.016328	Cxcr2;Fpr2;Cxcl17;S100a9;Il1f6;Kit;Pde4d;Pde4b;Ccr2
GO:0051707	response to other organism	http://amigo.geneontology.org/amigo/term/GO:0051707	942	20	6.82256	2.93145	1.5e-05	0.0187603	Cfd;Gzma;Ltf;Tnfrsf14;Hp;Pck1;Cyp1a1;Cyp2e1;Chrm2;Defb41;Reg3g;S100a9;Cyp3a25;Il1f6;Macrod2;Pde4d;C3;Reg4;Pde4b;Fabp4
GO:0005506	iron ion binding	http://amigo.geneontology.org/amigo/term/GO:0005506	200	9	1.44853	6.21321	1.55e-05	0.0187603	Ltf;Aox4;Cyp1a1;Cyp2e1;Cyp2b9;Cyp3a25;Cyp2b13;Cyp2j5;Cyp7a1
GO:0043207	response to external biotic stimulus	http://amigo.geneontology.org/amigo/term/GO:0043207	945	20	6.84428	2.92215	1.57e-05	0.0187603	Cfd;Gzma;Ltf;Tnfrsf14;Hp;Pck1;Cyp1a1;Cyp2e1;Chrm2;Defb41;Reg3g;S100a9;Cyp3a25;Il1f6;Macrod2;Pde4d;C3;Reg4;Pde4b;Fabp4
GO:0006631	fatty acid metabolic process	http://amigo.geneontology.org/amigo/term/GO:0006631	372	12	2.69426	4.45392	1.73e-05	0.0187603	Ces1f;Pck1;Cyp2e1;Elovl3;Olah;Cyp2b9;Acsm3;Cyp2b13;C3;Prkag2;Fabp4;Cyp7a1
GO:0009607	response to biotic stimulus	http://amigo.geneontology.org/amigo/term/GO:0009607	977	20	7.07605	2.82644	2.53e-05	0.0249938	Cfd;Gzma;Ltf;Tnfrsf14;Hp;Pck1;Cyp1a1;Cyp2e1;Chrm2;Defb41;Reg3g;S100a9;Cyp3a25;Il1f6;Macrod2;Pde4d;C3;Reg4;Pde4b;Fabp4
GO:0060326	cell chemotaxis	http://amigo.geneontology.org/amigo/term/GO:0060326	280	10	2.02794	4.93112	3.8e-05	0.0343718	Cxcr2;Fpr2;Cxcl17;S100a9;Il1f6;Kit;Pde4d;Pde4b;Ccr2;Wnk1
GO:0032787	monocarboxylic acid metabolic process	http://amigo.geneontology.org/amigo/term/GO:0032787	554	14	4.01242	3.48917	5.09e-05	0.0425284	Ces1f;Pck1;Cyp1a1;Cyp2e1;Elovl3;Olah;Cyp2b9;Acsm3;Cyp2b13;Kit;C3;Prkag2;Fabp4;Cyp7a1
GO:0006954	inflammatory response	http://amigo.geneontology.org/amigo/term/GO:0006954	640	15	4.63528	3.23605	6.39e-05	0.0495165	Cxcr2;Orm2;Hp;Fpr2;Cxcl17;Orm1;Reg3g;Ak7;S100a9;Il1f6;Kit;C3;Fabp4;Ccr2;Cd200r3
