# Supplementary material for: A Topological Cluster of Differentially Regulated Genes in Mice Lacking PER3
Source: Front Mol Neurosci. 2020 Feb 13;13:15. doi: 10.3389/fnmol.2020.00015 (PMC7031657; doi:10.3389/fnmol.2020.00015)
Supplement: Supplementary file 6 [file Table_6.XLSX]

## Sheet: Sheet1
Data file S6. Top 500 transcripts whose expression covaries with Per3 (1421086_at) in BXD mice data for the eye [M430v2 (Sep08) RMA].
For each transcript is shown chromosome location, the mean expression level from the BXD lines, the maximum LRS valueand the chromosomal location of the LRS peak, the correlation bewtween expression values (sample r), the number of contribting BXD lines, and the unadjusted p value for the correlation.
Trait : Eye M430v2 (Sep08) RMA : 1421086_at
Database : Eye M430v2 (Sep08) RMA
Record	Symbol	Description	Location (Chr: Mb)	Mean Expr	Max LRS	Max LRS Location (Chr: Mb)	Sample r	N Cases	Sample p(r)
1421086_at	Per3	period 3	Chr4: 151.005761	7.31732	99.3	Chr4: 150.657930	1	68	0
1460662_at	Per3	period 3	Chr4: 151.004746	7.78221	149.1	Chr4: 150.657930	0.927158	68	0
1437708_x_at	Vamp3	vesicle-associated membrane protein 3 (cellubrevin)	Chr4: 151.047315	11.6363	151	Chr4: 150.657930	-0.863818	68	0
1421087_at	Per3	period 3	Chr4: 151.003946	10.1498	104.3	Chr4: 150.657930	0.863525	68	0
1436386_x_at	1700029I01Rik	RIKEN cDNA 1700029I01 gene	Chr4: 147.515696	4.95657	66	Chr4: 144.941814	-0.798204	68	0
1444113_at	8030493P09Rik	RIKEN cDNA 8030493P09 non-coding sequence	Chr4: 149.502968	8.01474	76.7	Chr4: 148.882237	-0.7821	68	0
1422279_at	Fv1	Friend virus susceptibility 1	Chr4: 147.869730	7.89544	119.3	Chr4: 144.941814	0.776624	68	0
1458426_at	Kif1b	kinesin family member 1B	Chr4: 149.272084	7.88153	146.2	Chr4: 148.882237	-0.763273	68	6.66134e-16
1445214_at	Rex2	reduced expression 2	Chr4: 147.516599	7.05541	95.8	Chr4: 144.941814	-0.757759	68	1.33227e-15
1438237_at	Rex2	reduced expression 2	Chr4: 146.198259	6.52421	140.4	Chr4: 144.941814	0.744254	68	1.02141e-14
1460596_at	Agtrap	angiotensin II, type I receptor-associated protein	Chr4: 148.077579	8.75307	135.8	Chr4: 144.941814	-0.742878	68	1.22125e-14
1424784_at	1700029I01Rik	RIKEN cDNA 1700029I01 gene	Chr4: 147.180036	7.05821	93.5	Chr4: 144.941814	-0.73634	68	3.04201e-14
1425113_x_at	D630002G06	polymorphic long terminal repeat sequence (based on strong QTL, assumed to be cis-acting on distal Chr 4)	Chr4: 143.668796	9.65763	109.7	Chr4: 144.941814	0.723572	68	1.63647e-13
1426074_at	Iap	intracisternal A particle sequence	Chr4: 148.156200	7.78099	109.6	Chr4: 144.941814	0.718788	68	2.98206e-13
1436331_at	Vps13d	vacuolar protein sorting 13D (yeast)	Chr4: 144.972671	8.72248	49.3	Chr4: 144.941814	-0.70428	68	1.68887e-12
1459054_at	Casz1	castor homolog 1, zinc finger	Chr4: 148.952994	8.58898	71.8	Chr4: 148.882237	0.701292	68	2.37677e-12
1452195_s_at	Sfi1	Sfi1 homolog, spindle assembly associated	Chr11: 3.132286	9.18019	61.5	Chr4: 144.941814	0.689885	68	8.37419e-12
1451477_at	1700029I01Rik	RIKEN cDNA 1700029I01 gene	Chr4: 147.140091	7.12758	56.8	Chr4: 148.882237	0.686808	68	1.16249e-11
1430945_at	A930028C08Rik	RIKEN cDNA A930028C08	Chr4: 149.364713	7.89096	105.3	Chr4: 148.882237	-0.685759	68	1.29861e-11
1460442_at	MGC67181	long terminal repeat RMER6A, ERK class	Chr4: 147.821554	6.27271	112.4	Chr4: 144.941814	0.685634	68	1.31581e-11
1417120_at	Iip45	invasion inhibitory protein 45	Chr4: 147.862246	8.1224	72.9	Chr4: 144.941814	-0.684217	68	1.52676e-11
1429309_at	Prdm16	PR domain containing 16	Chr4: 154.319475	8.77451	48.4	Chr4: 154.025994	0.683106	68	1.71425e-11
1448599_s_at	Iip45	invasion inhibitory protein 45	Chr4: 147.860799	8.85815	56.9	Chr4: 144.941814	-0.682472	68	1.83085e-11
1446185_at	Mtor	mechanistic target of rapamycin (serine/threonine kinase)	Chr4: 148.486754	5.93187	34.6	Chr4: 144.941814	-0.681183	68	2.09179e-11
1434566_a_at	4732496O08Rik	RIKEN cDNA 4732496O08 gene	Chr4: 143.420854	9.04457	35.3	Chr4: 148.882237	-0.678819	68	2.66511e-11
1428778_at	Sfi1	Sfi1 homolog, spindle assembly associated	Chr11: 3.132193	8.64489	57.2	Chr4: 143.369823	0.669596	68	6.68894e-11
1436146_at	4930481A15Rik	expressed sequence BE954273	Chr19: 5.422461	5.63566	61.2	Chr4: 148.882237	-0.669594	68	6.69018e-11
1434455_at	Fbxo44	F-box protein 44	Chr4: 148.152866	9.24543	86.2	Chr4: 144.941814	-0.661697	68	1.42717e-10
1442183_at	U046659	U046659, similar to carnitine deficiency-associated gene expressed in ventricle 3 isoform CDV3B	Chr4: 145.841250	7.21127	40.1	Chr4: 144.941814	-0.65981	68	1.70378e-10
1453068_at	Prdm2	PR domain containing 2, with ZNF domain	Chr4: 143.128446	10.339	60.9	Chr4: 143.189882	0.652835	68	3.23704e-10
1426787_at	Sfi1	Sfi1 homolog, spindle assembly associated	Chr11: 3.132885	8.99261	61.5	Chr4: 144.941814	0.652754	68	3.26083e-10
1421260_a_at	Srm	spermidine synthase	Chr4: 148.594301	10.115	59.1	Chr4: 144.941814	0.650167	68	4.11637e-10
1444465_at	Ube4b	ubiquitination factor E4B	Chr4: 149.387742	6.68544	28.4	Chr4: 148.882237	0.643483	68	7.42535e-10
1441445_at	Per3	period 3	Chr4: 151.042452	8.98115	65.5	Chr4: 149.906312	-0.634352	68	1.61816e-09
1429308_at	Prdm16	PR domain containing 16	Chr4: 154.320395	6.50126	124.7	Chr4: 154.025994	-0.630904	68	2.15464e-09
1458156_at	E230012J19Rik	RIKEN cDNA E230012J19 gene	Chr4: 150.417524	9.03078	22.4	Chr4: 148.882237	-0.627089	68	2.94355e-09
1437478_s_at	Efhd2	EF hand domain containing 2	Chr4: 141.858490	11.5146	164.7	Chr4: 141.615125	-0.620835	68	4.85759e-09
1442005_at	AW987390	ESTs, Weakly similar to drebrin-like [] [M.musculus]	Chr4: 149.975272	6.92391	37.3	Chr4: 150.657930	0.61761	68	6.2576e-09
1441151_at	Rex2	reduced expression 2 (in segmentally duplicated CNV region)	Chr4: 145.849612	7.50308	52.7	Chr4: 144.941814	-0.609205	68	1.19212e-08
1436574_at	1700029I01Rik	novel KRAB box containing gene	Chr4: 145.830550	7.62229	19.3	Chr4: 143.189882	-0.608023	68	1.30293e-08
1422314_at	Clcn6	chloride channel 6	Chr4: 148.006498	8.29224	23	Chr4: 148.882237	0.598993	68	2.46595e-08
1447901_x_at	Sfi1	Sfi1 homolog, spindle assembly associated	Chr11: 3.131945	8.92543	57.2	Chr4: 144.941814	0.596789	68	2.88953e-08
1448095_at	Lzic	leucine zipper and CTNNBIP1 domain containing	Chr4: 149.499418	8.0302	54.2	Chr4: 148.882237	0.59341	68	3.67452e-08
1419022_a_at	Eno1	enolase 1, alpha non-neuron	Chr4: 150.247623	14.5453	15.1	Chr10: 19.937470	0.59074	68	4.43285e-08
1458176_at	Per3	period 3	Chr4: 151.033369	10.0092	41.5	Chr4: 150.657930	-0.589136	68	4.95717e-08
1424880_at	Trib1	tribbles 1	Chr15: 59.655428	9.65867	23.1	Chr4: 143.369823	0.588738	68	5.09615e-08
1418252_at	Padi2	peptidyl arginine deiminase, type II	Chr4: 140.952044	9.52812	197.1	Chr4: 140.924595	-0.572656	68	1.50228e-07
1459625_at	Mtor	mechanistic target of rapamycin (serine/threonine kinase)	Chr4: 148.503848	8.44457	29.8	Chr4: 144.941814	0.571876	68	1.58042e-07
1449939_s_at	Dlk1	delta-like 1 (subiculum and central nucleus of amygdala expression signature)	Chr12: 109.460172	7.08687	22.3	Chr4: 149.906312	0.562901	68	2.80325e-07
1456435_at	4930417P05Rik	RIKEN cDNA 4930417P05 gene	Chr4: 155.145232	6.51463	44.4	Chr4: 154.796059	-0.561842	68	2.99551e-07
1442947_x_at	BG069857	BG069857 EST	Chr14: 53.400730	5.53427	22.2	Chr4: 148.882237	0.560561	68	3.24466e-07
1455440_at	Clcn6	chloride channel 6	Chr4: 148.004291	10.3862	24	Chr4: 148.882237	0.558183	68	3.75947e-07
1419309_at	Pdpn	podoplanin (glycoprotein 38)	Chr4: 143.267475	12.1263	49.6	Chr4: 143.030450	0.55662	68	4.13852e-07
1439187_at	Vps13d	hypothetical protein LOC230895	Chr4: 144.975051	10.2655	41.2	Chr4: 144.941814	-0.556608	68	4.14148e-07
1448410_at	Ube4b	ubiquitination factor E4B, UFD2	Chr4: 149.328506	10.0199	32.4	Chr4: 148.882237	-0.556143	68	4.26128e-07
1429307_s_at	Lzic	leucine zipper and CTNNBIP1 domain containing	Chr4: 149.496221	8.74724	26.5	Chr4: 144.941814	-0.552102	68	5.44625e-07
1434482_at	D4Ertd22e	DNA segment, Chr 4, ERATO Doi 22, expressed	Chr4: 141.115324	9.34248	33.3	Chr4: 141.050324	0.54405	68	8.78374e-07
1426197_at	AI324046	expressed sequence AI324046	Chr12: 114.615978	5.08284	22.8	Chr4: 141.050324	-0.539824	68	1.12244e-06
1437537_at	Casp9	caspase 9	Chr4: 141.815402	8.89076	64.1	Chr4: 141.615125	-0.530925	68	1.85809e-06
1431090_at	1500011L16Rik	RIKEN cDNA 1500011K16 gene	Chr4: 155.717388	7.67126	86.9	Chr4: 155.741797	0.53065	68	1.88668e-06
1441414_at	Sfi1	Sfi1 homolog, spindle assembly associated	Chr11: 3.158794	8.63815	17.1	Chr4: 144.941814	0.529848	68	1.97275e-06
1436209_at	4732437J24Rik	RIKEN cDNA 4732437J24 gene	Chr4: 141.762080	8.63446	31.4	Chr4: 140.924595	0.52425	68	2.68295e-06
1456310_a_at	Faap20	Fanconi anemia-associated protein of 20 kDa	Chr4: 155.256591	9.34764	63.7	Chr4: 155.225671	-0.520463	68	3.29178e-06
1439069_a_at	Pisd	phosphatidylserine decarboxylase	Chr5: 32.736805	12.0069	25.4	Chr4: 143.369823	0.519618	68	3.44416e-06
1438646_x_at	2510039O18Rik	RIKEN cDNA 2510039O18 gene	Chr4: 147.947196	10.2088	52.2	Chr4: 144.941814	-0.515861	68	4.20485e-06
1446246_at	Gm438	gene model 438, (NCBI), similar to arylacetamide deacetylase (esterase)	Chr4: 144.777246	5.92329	40.7	Chr4: 144.941814	0.511495	68	5.28423e-06
1416743_at	Uap1	UDP-N-acetylglucosamine pyrophosphorylase 1	Chr1: 170.142311	10.6447	18.4	Chr18: 82.377768	-0.511361	68	5.32113e-06
1434087_at	Mthfr	5,10-methylenetetrahydrofolate reductase (hyperhomocysteinemia)	Chr4: 148.058990	9.79583	43.6	Chr4: 143.369823	0.508401	68	6.19953e-06
1433571_at	Serinc5	serine incorporator 5	Chr13: 92.711357	7.56605	14.9	Chr4: 155.225671	-0.504945	68	7.39516e-06
1448390_a_at	Dhrs3	dehydrogenase/reductase (SDR family) member 3	Chr4: 144.923963	10.5932	18.1	Chr4: 154.025994	-0.504348	68	7.62259e-06
1421290_at	Hspb7	heat shock protein family, member 7 (cardiovascular)	Chr4: 141.424471	7.5	23.8	Chr4: 141.050324	0.502236	68	8.4788e-06
1428740_a_at	Pigt	phosphatidylinositol glycan, class T	Chr2: 164.507523	9.58585	14.4	Chr4: 151.280597	0.501979	68	8.58897e-06
1419023_x_at	Eno1	enolase 1, alpha non-neuron	Chr4: 150.247831	14.4065	12.7	Chr10: 19.937470	0.496692	68	1.11714e-05
1440571_at	Eif4g3	eukaryotic translation initiation factor 4 gamma, 3	Chr4: 138.189568	7.18101	173.4	Chr4: 136.674648	-0.495759	68	1.16959e-05
1450498_at	Mthfr	5,10-methylenetetrahydrofolate reductase (hyperhomocysteinemia)	Chr4: 148.055731	8.13063	10.7	Chr10: 22.000000	0.493785	68	1.28814e-05
1445643_at	Pisd	phosphatidylserine decarboxylase	Chr5: 32.727007	6.59376	35	Chr4: 143.369823	0.493575	68	1.30139e-05
1440776_at	3732412D22Rik	RIKEN cDNA 3732412D22 gene	Chr5: 66.748169	7.71665	45.4	Chr5: 67.573066	0.493451	68	1.30924e-05
1416534_at	Dpf2	D4, zinc and double PHD fingers family 2	Chr19: 5.897419	10.8457	9.1	Chr4: 155.225671	0.492428	68	1.37598e-05
1446732_at	A230098N10Rik	RIKEN cDNA A230098N10	Chr4: 147.482550	6.47103	31.2	Chr4: 144.941814	-0.488911	68	1.63028e-05
1454846_at	Utp15	U3 small nucleolar RNA-associated protein 15 homolog	Chr13: 98.246862	8.7641	11.5	Chr2: 131.557458	-0.48343	68	2.11446e-05
1422648_at	Slc7a2	solute carrier family 7 (cationic amino acid transporter, y+ system), member 2	Chr8: 40.917465	5.99797	14.1	Chr8: 38.012849	-0.483396	68	2.11785e-05
1435353_a_at	Pisd	phosphatidylserine decarboxylase	Chr5: 32.737176	11.0739	20.4	Chr4: 143.369823	0.481781	68	2.28441e-05
1439058_at	5730453G22Rik	RIKEN cDNA 5730453G22 gene	Chr4: 127.034438	9.37241	44.7	Chr4: 126.716711	0.480849	68	2.3859e-05
1418099_at	Tnfrsf1b	tumor necrosis factor receptor superfamily, member 1b	Chr4: 145.213550	8.07248	13.9	Chr4: 150.657930	-0.478005	68	2.72193e-05
1435982_at	Stx12	syntaxin 12	Chr4: 132.853531	9.19446	21.7	Chr4: 135.992747	-0.477409	68	2.7978e-05
1439070_x_at	Pisd	phosphatidylserine decarboxylase	Chr5: 32.736808	10.397	21.1	Chr4: 143.189882	0.475654	68	3.03221e-05
1439422_a_at	Fam132a	adipose-derived insulin-sensitizing factor, family with sequence similarity 132, member A	Chr4: 155.966479	8.94981	124.2	Chr4: 155.894026	-0.474497	68	3.19665e-05
1441282_at	Ssu72	RNA polymerase II CTD phosphatase homolog (yeast)	Chr4: 155.718368	8.36183	111.1	Chr4: 155.741797	0.472008	68	3.57871e-05
1455182_at	Kif1b	kinesin family member 1B	Chr4: 149.233935	9.61252	12.9	Chr4: 148.882237	-0.469653	68	3.9784e-05
1435129_at	Ptp4a2	protein tyrosine phosphatase 4a2	Chr4: 129.839203	11.9862	89.4	Chr4: 129.572170	0.469367	68	4.02968e-05
1459714_at	Npc1	Niemann Pick type C1	Chr4: 141.221017	5.47067	72.7	Chr4: 141.050324	-0.468884	68	4.11771e-05
1422886_a_at	Clk4	CDC like kinase 4	Chr11: 51.277853	10.5314	85.6	Chr11: 51.107252	-0.468377	68	4.21181e-05
1431106_a_at	BE373131	BE373131	Chr19: 8.019660	6.52328	41.6	Chr4: 144.941814	0.468122	68	4.26005e-05
1441937_s_at	Pink1	PTEN induced putative kinase 1 (recessive Parkinson's disease)	Chr4: 138.313503	11.0891	109.6	Chr4: 138.255627	-0.467737	68	4.33368e-05
1449180_at	Kcmf1	potassium channel modulatory factor 1	Chr6: 72.841771	8.94487	13.9	Chr4: 140.844690	0.467532	68	4.37331e-05
1423164_at	Tm7sf1	transmembrane 7 superfamily member 1	Chr13: 13.358087	9.096	10.9	Chr3: 144.672147	0.465194	68	4.8502e-05
1435252_at	B3galt6	UDP-Gal:betaGal beta 1,3-galactosyltransferase, polypeptide 6	Chr4: 155.990545	5.43698	125.5	Chr4: 155.894026	-0.463996	68	5.11285e-05
1439160_at	4732496O08Rik	RIKEN cDNA 4732496O08 gene	Chr4: 143.419322	9.23903	14.8	Chr4: 141.236455	0.463844	68	5.14693e-05
1424043_at	Ppil4	peptidylprolyl isomerase (cyclophilin)-like 4	Chr10: 7.822001	10.1041	33.1	Chr10: 5.737023	-0.463439	68	5.23914e-05
1427404_x_at	Eno1	enolase 1, alpha non-neuron	Chr4: 150.248058	14.0273	11.7	Chr1: 190.124682	0.463431	68	5.24116e-05
1435628_x_at	A430108B07Rik	RIKEN cDNA A430108B07 gene	Chr10: 25.895642	7.7616	21.7	Chr17: 33.110219	-0.461987	68	5.58257e-05
1456849_at	Bicd1	bicaudal D homolog 1 (Drosophila)	Chr4: 137.600088	8.57066	135	Chr4: 136.674648	-0.461698	68	5.6532e-05
1449886_a_at	Timm9	translocase of inner mitochondrial membrane 9 homolog	Chr12: 71.123564	8.38529	12.9	Chr18: 82.377768	-0.460951	68	5.83993e-05
1448254_at	Ptn	pleiotrophin	Chr6: 36.715013	10.8664	11.6	Chr4: 151.280597	-0.459861	68	6.12272e-05
1450820_a_at	Ntng2	netrin G2	Chr2: 29.194946	5.62385	26.4	Chr4: 149.906312	-0.457778	68	6.69833e-05
1427797_s_at	Rsrc1	arginine/serine-rich coiled-coil 1	Chr3: 152.329814	8.20668	12.3	Chr4: 153.232320	0.45566	68	7.3339e-05
1418154_at	BC004022	cDNA sequence BC004022	Chr8: 86.844694	9.61403	17.7	Chr5: 137.125241	0.452706	68	8.31364e-05
1416926_at	Trp53inp1	transformation related protein 53 inducible nuclear protein 1	Chr4: 11.173859	10.7585	14.2	Chr18: 82.377768	-0.451726	68	8.66426e-05
1430317_at	Ube2j2	ubiquitin-conjugating enzyme E2, J2 homolog (yeast)	Chr4: 155.945154	8.50745	102.3	Chr4: 155.894026	-0.450551	68	9.10244e-05
1424516_at	B230354K17Rik	RIKEN cDNA B230354K17 gene	Chr17: 45.441965	9.98962	9.6	Chr10: 28.393378	-0.450041	68	9.29878e-05
1441765_at	Pank1	pantothenate kinase 1	Chr19: 34.809476	6.01239	20	Chr12: 69.603797	-0.446183	68	0.000109162
1425694_at	Tbx5	T-box 5	Chr5: 119.882935	6.19904	10.6	Chr5: 60.395773	0.446036	68	0.000109825
1440511_at	Psme4	proteasome (prosome, macropain) activator subunit 4	Chr11: 30.795253	8.06324	39.5	Chr11: 33.490349	-0.445424	68	0.000112632
1440455_at	Camk2n1	calcium/calmodulin-dependent protein kinase 2 inhibitor 1	Chr4: 138.459653	8.42141	163.4	Chr4: 138.255627	-0.444159	68	0.000118638
1431003_a_at	Faap20	Fanconi anemia-associated protein of 20 kDa	Chr4: 155.251000	8.94382	56.5	Chr4: 155.236019	-0.443566	68	0.000121557
1459810_at	C20oirf24	human chromosome 20 open reading frame 24 (RAB5-interacting protein)	--	5.36972	16.9	Chr4: 153.933969	-0.443349	68	0.00012264
1418656_at	Lsm5	LSM5 homolog, U6 small nuclear RNA associated (S. cerevisiae)	Chr6: 56.701130	9.8398	11.8	Chr4: 81.726726	-0.441928	68	0.000129958
1449229_a_at	Cdkl2	cyclin-dependent kinase-like 2 (CDC2-related kinase)	Chr5: 92.006205	9.18739	14.8	Chr4: 143.189882	-0.441733	68	0.000130991
1444602_at	Ophn1	oligophrenin 1	ChrX: 98.554331	5.88825	14.6	Chr5: 137.125241	-0.440981	68	0.00013505
1427798_x_at	BF580235	BF580235 long terminal repeat sequence	ChrUn: 1.000000	6.85567	12.5	Chr13: 93.093865	0.440517	68	0.000137616
1417321_at	Zcchc7	zinc finger, CCHC domain containing 7	Chr4: 44.931810	11.1247	22.3	Chr4: 155.225671	-0.438907	68	0.000146855
1426749_at	Prmt3	protein arginine N-methyltransferase 3	Chr7: 49.857669	9.86396	13	Chr1: 192.154974	-0.438821	68	0.000147366
1449117_at	Jund	jun D proto-oncogene	Chr8: 70.700067	11.8028	13.5	Chr2: 103.450499	0.438806	68	0.000147457
1426387_x_at	Pisd	phosphatidylserine decarboxylase	Chr5: 32.736392	11.9075	27	Chr4: 143.369823	0.438399	68	0.000149886
1449680_at	2610021K21Rik	RIKEN cDNA 2610021K21 gene	Chr12: 99.747047	6.05836	11.1	Chr13: 119.390734	0.438157	68	0.000151352
1450932_s_at	Dock9	dedicator of cytokinesis 9	Chr14: 121.542425	10.4536	16.9	Chr4: 155.225671	-0.436819	68	0.000159686
1458195_at	Vps13d	10 days neonate skin cDNA, RIKEN full-length enriched library, clone:4732457M22 product:inferred: hypothetical protein KIAA0453 - human (fragment), full insert sequence.	Chr4: 145.053026	7.65439	25.9	Chr4: 144.941814	-0.43662	68	0.000160961
1434914_at	Rab6b	RAB6B, member RAS oncogene family	Chr9: 103.184819	10.8856	25.4	Chr4: 144.941814	-0.435987	68	0.000165081
1441898_at	Gab3	growth factor receptor bound protein 2-associated protein 3	Chr19: 10.978351	8.87281	13	Chr13: 108.957958	0.435745	68	0.00016668
1436571_at	KIAA0459	KIAA0459 protein	Chr4: 138.891284	9.33463	30.5	Chr4: 138.255627	-0.434527	68	0.000174948
1455083_at	Atp11c	Atpase, class VI, type 11C	ChrX: 60.223568	9.49088	33.1	ChrX: 73.028443	-0.433953	68	0.00017897
1446101_at	Rere	arginine-glutamic acid dipeptide (RE) repeats (atrophin-1 like)	Chr4: 150.527398	7.45329	17.2	Chr4: 150.657930	0.433607	68	0.000181435
1440593_at	Hs6st3	heparan sulfate 6-O-sulfotransferase 3	Chr14: 119.241138	5.19046	11	Chr4: 155.225671	-0.433349	68	0.000183296
1434567_at	4732496O08Rik	RIKEN cDNA 4732496O08 gene	Chr4: 143.420495	9.44471	23.4	Chr4: 143.369823	0.43251	68	0.000189468
1447842_x_at	Tcn2	transcobalamin 2	Chr11: 3.917246	11.1738	9.6	Chr10: 22.000000	0.432226	68	0.000191591
1418315_at	Nr5a1	nuclear receptor subfamily 5, group A, member 1	Chr2: 38.692837	6.2482	8.7	Chr6: 17.630009	0.432125	68	0.000192354
1456134_x_at	Yif1	Yip1 interacting factor homolog (S. cerevisiae)	Chr19: 5.092411	9.30735	10.9	Chr7: 134.834414	0.431968	68	0.000193547
1457920_at	4832404P21Rik	ESTs	Chr5: 111.593767	6.6277	12.5	Chr4: 149.906312	0.431791	68	0.000194901
1434975_x_at	9030221M09Rik	similar to mitochondrial phosphatidylserine decarboxylase	Chr11: 3.131793	12.0239	26.9	Chr4: 143.369823	0.431325	68	0.000198496
1449574_a_at	Cdc42	cell division cycle 42 (activator of rac; gephyrin and collybistin signaling partner in inhibitory postsynaptic receptor complex)	Chr4: 137.328773	12.8365	19.4	Chr4: 136.674648	0.430536	68	0.000204732
1450263_at	Pcdhb5	protocadherin beta 5	Chr18: 37.322577	6.44087	10.5	Chr18: 34.260604	0.43038	68	0.000205985
1449272_at	Igsf4b	immunoglobulin superfamily, member 4B (synaptic cell adhesion molecule 3)	Chr1: 173.334863	10.7871	11.4	Chr5: 58.515640	0.429878	68	0.000210058
1426718_at	Skiv2l2	superkiller viralicidic activity 2-like 2 (S. cerevisiae)	Chr13: 112.867924	10.5565	13.9	Chr13: 108.957958	-0.42973	68	0.000211281
1450912_at	Ms4a1	membrane-spanning 4-domains, subfamily A, member 1	Chr19: 11.250490	4.96953	15.3	Chr10: 55.515150	-0.429329	68	0.000214609
1416429_a_at	Cat	catalase	Chr2: 103.454027	10.2919	32.1	Chr2: 103.450499	-0.429062	68	0.000216849
1417565_at	Abhd5	abhydrolase domain containing 5	Chr9: 122.380949	9.61609	12.7	Chr1: 190.124682	-0.429016	68	0.000217241
1416186_at	Pnrc2	proline-rich nuclear receptor coactivator 2	Chr4: 135.871142	10.5784	12	Chr12: 104.393980	-0.428127	68	0.000224872
1419945_s_at	Rab2a	RAB2A, member RAS oncogene family	Chr4: 8.607208	12.0837	18.8	Chr1: 189.361953	-0.427761	68	0.000228084
1450576_a_at	Sf3a2	splicing factor 3a, subunit 2	Chr10: 80.804520	8.4225	11.1	Chr2: 112.284850	0.427615	68	0.00022938
1460706_s_at	Rer1	RER1 retention in endoplasmic reticulum 1 homolog (S. cerevisiae)	Chr4: 155.074482	9.98025	35.7	Chr4: 155.225671	-0.427562	68	0.000229855
1447215_at	Fzd5	frizzled homolog 5 (Drosophila)	Chr5: 123.327093	7.00983	18.9	Chr4: 151.280597	0.427397	68	0.000231325
1456729_x_at	Rtel1	regulator of telomere elongation helicase 1	Chr2: 181.356436	5.33883	10.9	Chr10: 22.000000	-0.427244	68	0.000232696
1424265_at	Npl	N-acetylneuraminate pyruvate lyase (dihydrodipicolinate synthase)	Chr1: 153.503016	9.91128	9.4	Chr13: 107.135408	-0.427227	68	0.000232852
1416184_s_at	Hmga1	high mobility group AT-hook 1	Chr17: 27.563097	10.9956	14.8	Chr2: 131.557458	0.426084	68	0.000243353
1423105_a_at	Yeats4	YEATS domain containing 4	Chr10: 117.215297	11.072	11	Chr18: 82.377768	-0.425738	68	0.000246619
1423181_s_at	Clns1a	chloride channel, nucleotide-sensitive, 1A	Chr7: 97.718393	10.5563	42.6	Chr7: 97.692111	-0.42537	68	0.000250133
1456308_x_at	Trim28	tripartite motif protein 28	Chr7: 13.030887	11.8981	9.8	Chr12: 65.049772	0.425364	68	0.000250195
1442702_at	LOC242707	ESTs	Chr10: 92.142076	6.14686	16.4	Chr5: 3.143128	0.425143	68	0.000252327
1436697_at	Vps26c	VPS26 endosomal protein sorting factor C (Down syndrome critical region gene 3)	Chr16: 94.527185	8.40778	16.6	Chr5: 137.010795	-0.425127	68	0.000252487
1452478_at	Alpk2	alpha-kinase 2 (heart alpha-kinase)	Chr18: 65.265551	8.36154	19	Chr5: 24.309957	0.423932	68	0.000264319
1439065_x_at	C030034I22Rik	RIKEN cDNA C030034I22 gene	Chr4: 146.050785	5.36986	29.3	Chr4: 150.657930	0.4239	68	0.000264633
1440745_at	Prdm16	PR domain containing 16	Chr4: 154.318534	8.15471	15.7	Chr15: 53.862888	0.423878	68	0.000264863
1421519_a_at	Zfp120	zinc finger protein 120	Chr2: 150.116473	8.30867	9.9	Chr5: 102.108242	-0.423516	68	0.000268545
1455621_at	BC066107	cDNA sequence BC066107	Chr17: 32.882291	6.80478	10.4	Chr2: 116.006377	-0.422462	68	0.000279563
1419809_s_at	Cog4	component of oligomeric golgi complex 4	Chr8: 110.881885	9.18623	14.1	Chr12: 104.719074	-0.422343	68	0.000280824
1419074_at	Chac2	ChaC, cation transport regulator homolog 2	Chr11: 30.977051	9.21368	12.5	Chr2: 103.450499	-0.422201	68	0.000282353
1451325_at	Fyttd1	forty-two-three domain containing 1	Chr16: 32.908365	7.66625	9.6	Chr18: 80.000000	-0.42113	68	0.000294063
1426620_at	Chst10	carbohydrate sulfotransferase 10	Chr1: 38.864488	8.57184	16.8	Chr1: 38.394703	0.421101	68	0.000294383
1434848_at	Gpr27	G protein-coupled receptor 27	Chr6: 99.694552	8.5123	11.5	Chr4: 140.844690	-0.420918	68	0.000296436
1448208_at	Smad1	SMAD, mothers against decapentaplegic 1	Chr8: 79.338638	10.1862	16	Chr10: 19.937470	-0.420098	68	0.000305762
1436944_x_at	Pisd	phosphatidylserine decarboxylase	Chr5: 32.736381	12.1156	23.2	Chr4: 143.369823	0.419701	68	0.00031038
1455696_a_at	Prpf4b	PRP4 pre-mRNA processing factor 4 homolog B	Chr13: 34.905902	10.7891	21.7	Chr4: 155.225671	-0.419481	68	0.000312961
1448693_at	Gltpd1	glycolipid transfer protein domain containing 1	Chr4: 155.865415	9.03681	47.1	Chr4: 155.860937	0.419205	68	0.000316229
1445817_at	Kif1b	kinesin family member 1B	Chr4: 149.279332	6.02525	24.6	Chr4: 148.882237	-0.418745	68	0.000321751
1419181_at	Zfp326	zinc finger protein 326	Chr5: 105.915260	9.96954	13.2	Chr12: 65.049772	-0.418174	68	0.000328715
1453271_at	Phf14	PHD finger protein 14	Chr6: 12.047824	10.8064	15.8	Chr5: 137.125241	-0.416981	68	0.000343719
1434286_at	Trps1	trichorhinophalangeal syndrome I (human)	Chr15: 50.655145	8.52117	11.4	Chr1: 78.940498	-0.416717	68	0.000347135
1456537_at	A930033H14Rik	RIKEN cDNA A930033H14 gene	Chr10: 69.210486	8.29821	34.9	Chr10: 69.221160	0.416502	68	0.000349926
1418529_at	Osgep	O-sialoglycoprotein endopeptidase	Chr14: 50.916180	10.5814	13.6	Chr4: 155.894026	-0.415864	68	0.000358344
1440340_at	B3galt6	UDP-Gal:betaGal beta 1,3-galactosyltransferase, polypeptide 6	Chr4: 155.989505	6.5325	110.8	Chr4: 155.894026	-0.415468	68	0.000363649
1459235_at	A530058N18Rik	RIKEN cDNA A530058N18 gene	Chr3: 134.145877	5.3511	16.1	Chr18: 82.377768	-0.41506	68	0.000369209
AFFX-r2-Bs-phe-M_at	AFFX-r2-Bs-phe-M	Affymetrix bacterial gene phe control probe set	ChrZ: 1.000000	5.27021	19.1	Chr2: 114.197161	-0.415023	68	0.00036971
1440083_at	Cdc42	cell division cycle 42 (activator of Rac)	Chr4: 137.336477	8.31946	28.8	Chr4: 136.674648	0.414827	68	0.000372408
1427539_a_at	Zwint	ZW10 interactor	Chr10: 72.668881	7.17421	13.1	Chr9: 54.029558	-0.414554	68	0.000376198
1456390_at	Ppp2ca	protein phosphatase 2a, catalytic subunit, alpha isoform	Chr11: 52.123148	10.6765	13.5	Chr5: 24.321400	-0.413986	68	0.000384185
1449188_at	Midn	midnolin (midbrain nucleolar developmental protein)	Chr10: 80.157791	8.40849	11.4	Chr16: 60.329137	0.413646	68	0.000389041
1448131_at	Mfn2	mitofusin 2 (mitochondrial outer membrane large GTPase)	Chr4: 147.873725	10.7842	15.1	Chr4: 148.882237	-0.413617	68	0.000389452
1436950_at	Crkl	v-crk sarcoma virus CT10 oncogene homolog (avian)-like	Chr16: 17.486420	10.9251	11.9	Chr5: 137.125241	0.413382	68	0.00039285
1439794_at	Ntn4	netrin 4	Chr10: 93.746783	10.2173	31.6	Chr10: 92.924522	-0.413326	68	0.000393668
1436572_at	Ccdc45	coiled-coil domain-containing protein 45	Chr11: 106.817959	8.64123	14.6	Chr18: 82.377768	-0.41317	68	0.000395936
1419788_at	B230311I21	hypothetical protein B230311I21	Chr4: 128.567407	5.583	7.8	Chr5: 3.143128	-0.413105	68	0.000396889
1419976_s_at	Nfatc3	nuclear factor of activated T-cells, cytoplasmic, calcineurin-dependent 3	Chr8: 106.130066	9.32265	13.4	Chr2: 114.197161	-0.412574	68	0.000404718
1444518_at	St6galnac2	ST6 (alpha-N-acetyl-neuraminyl-2,3-beta-galactosyl-1,3)-N-acetylgalactosaminide alpha-2,6-sialyltransferase 2	Chr11: 116.185077	6.86901	15	Chr4: 88.807538	0.412436	68	0.000406779
1441379_at	AU045094	expressed sequence AU045094	Chr15: 70.227116	5.11187	12.1	Chr4: 150.657930	-0.412283	68	0.000409077
1415830_at	Orc5l	origin recognition complex, subunit 5-like	Chr5: 22.486578	9.36965	12.8	Chr2: 131.557458	-0.41203	68	0.000412896
1422233_at	Elk4	ELK4, member of ETS oncogene family	Chr1: 132.017691	8.01271	15	Chr4: 155.225671	0.411983	68	0.00041361
1422591_at	Tceb3	transcription elongation factor B (SIII), polypeptide 3	Chr4: 136.005422	8.32946	162.5	Chr4: 135.992747	-0.411843	68	0.000415733
1448367_at	Sdf4	stromal cell derived factor 4	Chr4: 156.010353	7.26374	84.4	Chr4: 155.894026	0.411469	68	0.000421486
1460354_a_at	Mrpl13	mitochondrial ribosomal protein L13	Chr15: 55.534119	9.70479	13.3	Chr10: 13.686973	-0.411359	68	0.000423173
1434408_at	Atxn3	ataxin 3	Chr12: 101.919111	7.93808	13.5	Chr10: 19.937470	-0.411358	68	0.000423201
1420514_at	Tmem47	transmembrane protein 47	ChrX: 81.097272	10.4759	18.5	ChrX: 80.055932	-0.411325	68	0.000423712
1419678_at	Lats2	large tumor suppressor 2	Chr14: 57.691170	9.55801	21.5	Chr5: 137.125241	0.41079	68	0.000432087
1434177_at	Ece1	endothelin converting enzyme 1	Chr4: 137.962814	9.19876	19.6	Chr4: 135.992747	0.410467	68	0.000437217
1425836_a_at	Limk1	LIM-domain containing, protein kinase	Chr5: 134.656678	8.90817	13.3	Chr14: 114.751225	0.41046	68	0.000437325
1437629_at	Arhgef19	Rho guanine nucleotide exchange factor (GEF) 19	Chr4: 141.256321	7.6398	43.7	Chr4: 141.236455	-0.410087	68	0.00044333
1450931_at	Dock9	dedicator of cytokinesis 9	Chr14: 121.542713	8.79999	9.8	Chr5: 93.725625	-0.409811	68	0.000447801
1434553_at	Tmem56	transmembrane protein 56	Chr3: 121.202153	10.2502	12.3	Chr5: 24.309957	-0.409694	68	0.000449721
1445604_at	BE945821	BE945821 EST	Chr2: 157.543384	7.14964	14.6	Chr19: 31.828272	-0.409278	68	0.000456573
1437193_s_at	Snrpb	small nuclear ribonucleoprotein B	Chr2: 130.171707	12.5975	10.4	Chr18: 82.106750	0.409073	68	0.000459993
1415864_at	Bpgm	2,3-bisphosphoglycerate mutase	Chr6: 34.504547	10.0748	27.4	Chr6: 34.483299	-0.409022	68	0.000460858
1451561_at	BC058674	cDNA sequence BC058674	Chr7: 45.027726	9.71655	10.5	Chr4: 121.044402	0.408665	68	0.000466858
1440823_x_at	D130058I21Rik	RIKEN cDNA D130058I21 gene	Chr11: 72.390163	8.21057	16.2	Chr4: 155.894026	0.408664	68	0.000466889
1423834_s_at	Gga1	golgi associated, gamma adaptin ear containing, ARF binding protein 1	Chr15: 78.894268	9.867	12.3	Chr9: 98.579310	0.408187	68	0.000475039
1448956_at	Stard10	START domain containing 10	Chr7: 101.343917	11.4498	12.8	Chr7: 105.551819	0.407931	68	0.00047946
1435001_at	Plaa	phospholipase A2, activating protein	Chr4: 94.567229	8.58134	12.9	Chr5: 135.879195	-0.407907	68	0.000479866
1425224_at	BC019561	cDNA sequence BC019561	Chr18: 67.479182	8.74962	10.2	Chr2: 131.557458	0.40775	68	0.000482605
1454862_at	Phldb2	pleckstrin homology-like domain, family B, member 2	Chr16: 45.746310	8.5992	10.9	Chr7: 134.827021	-0.407461	68	0.000487681
1447525_at	4930553F24Rik	RIKEN cDNA 493055F24Rik	Chr5: 31.268581	6.4445	13.5	Chr19: 58.565202	0.407408	68	0.000488621
1454696_at	Gnb1	guanine nucleotide binding protein, beta 1	Chr4: 155.558833	12.8987	131.7	Chr4: 155.502574	0.407139	68	0.000493391
1435173_at	Ate1	arginine-tRNA-protein transferase 1 (arginyltransferase 1)	Chr7: 130.391524	10.2676	8.5	Chr10: 13.686973	-0.407064	68	0.00049473
1455639_at	Rundc3a	RUN domain containing 3A	Chr11: 102.401931	7.93	16.2	Chr1: 147.054880	0.407045	68	0.000495062
1451665_a_at	Ap4s1	adaptor-related protein complex AP-4, sigma 1	Chr12: 51.716939	11.0637	10.7	Chr3: 53.246203	-0.406008	68	0.000513916
1440950_at	Akt1	thymoma viral proto-oncogene 1	Chr12: 112.655516	6.68771	13.6	Chr5: 107.072667	0.4058	68	0.000517775
1433748_at	Zdhhc18	zinc finger, DHHC domain containing 18	Chr4: 133.607005	9.06652	58.7	Chr4: 135.992747	0.405642	68	0.000520727
1440518_at	1700029I01Rik	RIKEN cDNA 1700029I01 gene	Chr4: 147.114409	5.37212	13.2	Chr4: 105.445591	0.405307	68	0.000527012
1429306_at	Lzic	leucine zipper and CTNNBIP1 domain containing	Chr4: 149.496100	7.42146	22.2	Chr4: 126.716711	-0.405158	68	0.000529845
1457410_at	Arhgap5	Rho GTPase activating protein 5	Chr12: 52.558907	8.57278	8.6	Chr6: 94.859233	-0.405156	68	0.000529887
1450519_a_at	Prkaca	protein kinase, cAMP dependent, catalytic, alpha	Chr8: 83.995826	10.3164	11.9	Chr4: 63.019978	0.405106	68	0.000530834
1443480_at	Rassf3	Ras association (RalGDS/AF-6) domain family 3	Chr10: 121.440847	6.63355	12.1	Chr19: 40.410259	0.405021	68	0.000532459
1430879_at	C030008P14Rik	RIKEN cDNA C030008P14 gene	Chr8: 35.579097	5.23663	10.7	Chr19: 30.814886	-0.404924	68	0.000534301
1452468_s_at	Mmab	methylmalonic aciduria (cobalamin deficiency) type B homolog (human)	Chr5: 114.432337	8.59434	11.3	Chr2: 118.906260	0.404875	68	0.000535255
1459448_at	D630003K02Rik	RIKEN cDNA D630003K02 gene	Chr7: 107.750003	8.05291	15.8	Chr7: 109.979743	0.404717	68	0.000538295
1427134_at	Sfrs12	splicing factor, arginine/serine-rich 12	Chr13: 103.741739	10.7592	12.7	Chr7: 134.834414	-0.404484	68	0.000542787
1420121_at	AA517858	AA517858	Chr14: 58.102028	4.92341	9.2	Chr2: 131.557458	-0.403982	68	0.00055263
1430100_at	Mrps15	mitochondrial ribosomal protein S15	Chr4: 126.051652	7.99825	49.6	Chr4: 125.588387	0.403979	68	0.000552684
1458679_a_at	Tatdn1	TatD DNase domain containing 1	Chr15: 58.904734	10.0726	10.5	Chr15: 97.576270	-0.403832	68	0.000555604
1453228_at	Stx11	syntaxin 11	Chr10: 12.940045	8.20864	49	Chr10: 13.687795	-0.403664	68	0.000558935
1424641_a_at	Thoc1	THO complex 1	Chr18: 9.993531	9.47759	11.1	Chr4: 155.225671	-0.403255	68	0.000567154
1423829_at	Fam49b	family with sequence similarity 49, member B	Chr15: 63.931007	11.031	13.9	Chr2: 103.450499	-0.403068	68	0.000570935
1424916_x_at	Zfp764	zinc finger protein 764	Chr7: 127.403779	7.91381	10.5	Chr3: 53.053282	-0.403067	68	0.000570963
1448497_at	Ercc3	excision repair cross-complementing rodent repair deficiency, complementation group 3	Chr18: 32.267162	9.39019	14.9	Chr4: 143.001819	-0.402684	68	0.000578788
1454469_at	5430434N17Rik	RIKEN cDNA 5430434N17 gene	Chr16: 42.509516	5.41593	11.5	Chr1: 191.333382	-0.402575	68	0.000581039
1438154_x_at	Faap20	Fanconi anemia-associated protein of 20 kDa	Chr4: 155.256591	8.93781	59.3	Chr4: 155.225671	-0.402527	68	0.000582034
1427110_at	Raver1	ribonucleoprotein PTB-binding 1	Chr9: 21.074191	8.1445	12.4	Chr1: 38.394703	0.402384	68	0.000585002
1431095_a_at	Herc5	hect domain and RLD 5	Chr6: 57.658035	8.91186	10.2	Chr2: 104.099551	0.402276	68	0.000587243
1434131_at	Rufy1	RUN and FYVE domain containing 1	Chr11: 50.389459	9.678	26	Chr11: 50.383261	-0.401973	68	0.0005936
1451168_a_at	Arhgdia	Rho GDP dissociation inhibitor (GDI) alpha	Chr11: 120.578145	11.5908	8.2	Chr2: 114.197161	0.401955	68	0.000593982
1457445_at	Trps1	trichorhinophalangeal syndrome I (human)	Chr15: 50.819532	9.06164	31.3	Chr15: 45.270954	-0.401704	68	0.000599298
1425785_a_at	Txk	TXK tyrosine kinase	Chr5: 72.700665	5.64248	12.9	Chr4: 155.493057	0.40168	68	0.000599799
1452146_a_at	Cox15	COX15 homolog, cytochrome c oxidase assembly protein (mitochondrial)	Chr19: 43.735354	7.98351	10.7	Chr18: 84.126263	-0.401649	68	0.000600467
1453850_at	MGC67181	long terminal repeat RMER6A, ERK class	Chr19: 47.026252	5.57275	12	Chr11: 117.246863	-0.401518	68	0.000603252
1424663_at	BC017647	hypothetical protein FLJ10700	Chr11: 78.155519	9.85998	14.5	Chr1: 189.361953	0.401517	68	0.000603272
1437910_at	Tmem39b	transmembrane protein 39b	Chr4: 129.676397	8.25117	41	Chr4: 129.572170	-0.401448	68	0.000604754
1451725_a_at	Psmd4	proteasome (prosome, macropain) 26S subunit, non-ATPase, 4	Chr3: 95.032985	8.35161	14.8	Chr12: 69.603797	0.401348	68	0.000606894
1415849_s_at	Stmn1	stathmin 1	Chr4: 134.473450	12.9268	17.8	Chr4: 135.992747	0.401248	68	0.000609041
1429656_at	Rhobtb1	Rho-related BTB domain containing 1	Chr10: 69.288949	6.96121	23.4	Chr10: 69.221160	0.401245	68	0.000609105
1437184_at	AA407526	expressed sequence AA407526	Chr5: 69.568212	6.7001	15.5	Chr12: 69.603797	-0.401242	68	0.000609174
1457434_s_at	Ptpla	protein tyrosine phosphatase-like (proline instead of catalytic arginine), member A (3-hydroxyacyl-CoA dehydrates 1)	Chr2: 14.026872	10.5637	18.2	Chr4: 141.615125	-0.401232	68	0.000609404
1444743_at	2810049G06Rik	0 day neonate cerebellum cDNA, RIKEN full-length enriched library, clone:C230024F22 product:unclassifiable, full insert sequence.	Chr12: 24.827439	5.24087	14.9	Chr8: 14.481190	-0.400805	68	0.000618668
1446650_at	BB183485	ESTs	Chr4: 151.083139	7.85215	10.3	Chr2: 62.162364	0.400769	68	0.000619459
1455929_x_at	Ppp2r1a	protein phosphatase 2 (formerly 2A), regulatory subunit A (PR 65), alpha isoform	Chr17: 20.965738	13.0584	13.6	Chr12: 69.603797	0.400443	68	0.000626629
1416065_a_at	Ankrd10	ankyrin repeat domain 10	Chr8: 11.611621	10.8625	16.1	Chr4: 135.992747	-0.400222	68	0.000631529
1449007_at	Btg3	B-cell translocation gene 3	Chr16: 78.360279	10.4985	15.8	Chr16: 79.252986	-0.400209	68	0.000631812
1424985_a_at	Sox10	SRY-box containing gene 10 transcription factor (dominant megacolon)	Chr15: 79.155394	8.32205	21.7	Chr4: 81.726726	0.400202	68	0.000631977
1431339_a_at	Efhd2	EF hand domain containing 2	Chr4: 141.858656	10.7433	52.6	Chr4: 141.236455	-0.399974	68	0.000637075
1442214_at	Nfib	nuclear factor I/B	Chr4: 82.298368	8.90833	17.5	Chr5: 135.879195	-0.399798	68	0.00064103
1439491_at	Lrrc38	leucine-rich repeat-containing protein 38	Chr4: 143.370450	7.22133	17.7	Chr4: 143.369823	-0.399566	68	0.000646302
1435356_at	Fbxo42	F box protein 42	Chr4: 141.203480	9.72643	12.4	Chr1: 78.859627	0.399544	68	0.000646795
1446005_at	D2Ertd337e	DNA segment, Chr 2, ERATO Doi 337, expressed	Chr2: 115.803038	7.55465	11.4	Chr2: 164.947462	0.399436	68	0.000649255
1457024_x_at	Slc35a2	solute carrier family 35 (UDP-galactose transporter), member 2	ChrX: 7.894354	8.57244	14.7	Chr5: 137.010795	-0.399378	68	0.000650578
1433649_at	Aof1	amine oxidase, flavin containing 1	Chr13: 47.084197	8.82659	13.5	Chr12: 65.049772	-0.399358	68	0.000651051
1439945_at	Zfp449	zinc finger protein 449	ChrX: 56.365170	8.02587	11.6	Chr5: 24.309957	-0.399085	68	0.000657323
1456832_at	Atrx	alpha thalassemia/mental retardation syndrome X-linked	ChrX: 105.891361	8.47263	10.7	Chr1: 151.271465	-0.398514	68	0.000670631
1423163_at	Bat4	HLA-B associated transcript 4	Chr17: 35.124247	9.42596	14.5	Chr6: 115.858131	0.39833	68	0.000674969
1423294_at	Mest	mesoderm specific transcript (Fgf8 target in developing neocortex)	Chr6: 30.747419	10.884	11.3	Chr4: 13.897101	0.398109	68	0.000680211
1426033_at	Rgs9	regulator of G-protein signaling 9	Chr11: 109.235129	7.44208	16.3	Chr4: 96.897254	0.398098	68	0.00068047
1459788_at	Gpr107	G protein-coupled receptor 107	Chr2: 31.216321	7.71283	14.7	Chr5: 141.222149	0.397978	68	0.000683328
1441076_at	Mpv17	ESTs, Weakly similar to RIKEN cDNA 5730493B19 [] [M.musculus]	--	7.47198	10.1	Chr4: 135.992747	-0.397886	68	0.000685534
1443992_at	C1orf103	receptor-interacting factor 1, nuclear receptor corepressor	Chr15: 8.289869	8.1415	15.9	Chr2: 114.197161	-0.397643	68	0.000691403
1439845_at	Hp1bp3	heterochromatin protein 1, binding protein 3	Chr4: 138.244118	8.45142	134.7	Chr4: 138.255627	-0.397609	68	0.000692219
1416100_at	Eif3s7	eukaryotic translation initiation factor 3, subunit 7 (zeta)	Chr15: 77.959584	11.5933	18.1	Chr12: 65.049772	0.397356	68	0.000698366
1438553_x_at	5830408C22Rik	clone IMAGE:4009222, mRNA, partial cds	Chr16: 64.762171	7.99473	13.3	Chr5: 137.010795	-0.397331	68	0.000698977
1422965_at	Agtrap	angiotensin II, type I receptor-associated protein	Chr4: 148.080167	8.58528	33.7	Chr4: 144.941814	-0.397205	68	0.000702064
1460352_s_at	Pik3r4	phosphatidylinositol 3 kinase, regulatory subunit, polypeptide 4, p150	Chr9: 105.687240	8.98583	89.5	Chr9: 105.639522	-0.3969	68	0.000709567
1437461_s_at	2810441O16Rik	RIKEN cDNA 2810441O16 gene	Chr3: 113.605481	9.56444	12.7	Chr4: 155.225671	-0.396877	68	0.000710145
1451291_at	Obfc2b	oligonucleotide/oligosaccharide-binding fold containing 2B	Chr10: 128.401405	10.1599	14.1	Chr4: 63.019978	0.396689	68	0.000714802
1445761_at	Mob3b	Mps One Binder kinase activator 3B	Chr4: 34.978646	6.62607	14.3	Chr4: 94.458902	0.396585	68	0.000717405
1455597_at	AI585793	expressed sequence AI585793	Chr18: 32.236174	10.0159	7.7	Chr11: 107.964395	-0.396267	68	0.000725389
1425969_a_at	Htt	huntingtin (Huntington's disease)	Chr5: 34.908782	8.92931	10.9	Chr19: 4.845967	0.396046	68	0.000730986
1437735_at	Ppp1r12a	protein phosphatase 1, regulatory (inhibitor) subunit 12A	Chr10: 108.279045	11.2631	13.5	Chr10: 18.896297	-0.395857	68	0.000735807
1455608_at	2610207F23Rik	RIKEN cDNA 2610207F23 gene	Chr3: 41.626877	8.21699	61.8	Chr3: 42.149120	-0.395416	68	0.000747152
1416540_at	Hgs	HGF-regulated tyrosine kinase substrate	Chr11: 120.483497	10.2815	8.9	Chr2: 116.006377	0.395227	68	0.000752071
1440430_at	A130004G07Rik	RIKEN cDNA A130004G07 gene	Chr2: 105.737951	6.5677	21	Chr2: 104.427306	-0.39494	68	0.000759588
1448147_at	Tnfrsf19	tumor necrosis factor receptor superfamily, member 19	Chr14: 60.964270	8.5576	11.7	Chr12: 69.603797	-0.394938	68	0.000759623
1424769_s_at	Cald1	caldesmon 1	Chr6: 34.775123	11.7301	9.4	Chr10: 27.031021	-0.394588	68	0.000768902
1428249_at	Pbxip1	pre-B-cell leukemia transcription factor interacting protein 1	Chr3: 89.434537	10.1	9.2	ChrX: 161.585623	0.39458	68	0.000769099
1439209_at	Tcf12	transcription factor 12	Chr9: 71.942468	9.43532	10.3	Chr5: 137.125241	-0.39457	68	0.000769382
1426978_at	Klhl2	kelch-like 2, Mayven	Chr8: 64.739903	9.25142	10.4	Chr12: 65.049772	-0.394357	68	0.000775072
1456609_at	Camk2n1	calcium/calmodulin-dependent protein kinase 2 inhibitor 1	Chr4: 138.457231	12.334	39.4	Chr4: 138.255627	0.394213	68	0.000778924
1454728_s_at	Atp8a1	ATPase, aminophospholipid transporter (APLT), class I, type 8A, member 1	Chr5: 67.619306	9.87294	10.6	Chr15: 83.096920	-0.39398	68	0.000785226
1451791_at	Tfpi	tissue factor pathway inhibitor	Chr2: 84.432901	7.87488	13.2	Chr8: 16.725153	-0.393922	68	0.000786809
1434629_at	Zfp482	zinc finger protein 482	Chr2: 37.432363	8.76453	11.1	Chr14: 83.640635	-0.393077	68	0.000810062
1447066_at	2310022K11Rik	ESTs	Chr3: 85.556087	5.64334	9.4	ChrX: 59.235496	-0.393036	68	0.000811201
1435769_at	Akap9	A kinase (PRKA) anchor protein (yotiao) 9	Chr5: 4.077940	10.6015	11.5	Chr2: 104.099551	-0.392119	68	0.000837158
1443055_at	Fam36a	family with sequence similarity 36, member A, downstream element	Chr1: 178.317133	5.36003	12.4	Chr15: 61.693736	-0.392018	68	0.000840072
1422535_at	Ccne2	cyclin E2	Chr4: 11.203948	6.13822	12.5	Chr3: 155.541974	-0.391857	68	0.000844704
1450095_a_at	Acyp1	acylphosphatase 1, erythrocyte (common) type	Chr12: 85.272618	9.59919	11.4	Chr2: 104.427306	-0.391795	68	0.000846521
1439523_at	D330027G24Rik	13 days embryo heart cDNA, RIKEN full-length enriched library, clone:D330027G24 product:unclassifiable, full insert sequence.	Chr5: 67.393274	7.62885	22.6	Chr5: 67.573066	0.391337	68	0.000859893
1434074_x_at	Arf4	ADP-ribosylation factor 4	Chr14: 26.656718	5.1384	14.1	Chr14: 33.090821	-0.391256	68	0.000862268
1423670_a_at	Srpr	signal recognition particle receptor (ER docking protein)	Chr9: 35.216428	11.3885	9	Chr2: 106.279658	0.391197	68	0.000864025
1443363_at	A430107O13Rik	hypothetical protein LOC214642	Chr6: 21.995968	5.96688	10.2	Chr1: 147.054880	-0.391101	68	0.000866857
1455433_at	LOC224598	Mus musculus transcribed sequence with weak similarity to protein pir:T14757 (H.sapiens) T14757 hypothetical protein DKFZp572C163.1 - human (fragment)	Chr17: 21.927213	8.30208	22	Chr17: 12.315221	-0.390918	68	0.000872313
1440974_at	Vta1	Vps20-associated 1	Chr10: 14.656776	7.13835	133.1	Chr10: 14.438092	-0.390907	68	0.00087263
1452204_at	Anks1	ankyrin repeat and SAM domain containing 1	Chr17: 28.062012	9.80224	11.1	Chr4: 63.271283	0.390893	68	0.000873047
1443649_at	Huwe1	HECT, UBA and WWE domain containing 1 (E3 ubiquitin-protein ligase HUWE1)	ChrX: 151.815669	8.43089	12	Chr3: 15.942672	-0.390743	68	0.000877528
1439583_x_at	D130029J02Rik	RIKEN cDNA D130029J02 gene	Chr8: 105.697064	9.23001	14.9	Chr4: 88.554042	0.390594	68	0.000882012
1423123_at	Rad54l	RAD54 like (S. cerevisiae)	Chr4: 116.094465	5.39887	11	Chr4: 81.726726	-0.390463	68	0.000885959
1455880_s_at	Becn1	beclin 1 (autophagy, coiled-coil, myosin-like BCL2-interacting protein)	Chr11: 101.288516	10.8424	11.3	Chr1: 190.124682	-0.390416	68	0.000887369
1419645_at	Cstf2	cleavage stimulation factor, 3' pre-RNA, subunit 2, 64kDa	ChrX: 134.086257	10.4044	13.1	Chr5: 137.010795	-0.390273	68	0.000891731
1428239_at	Ankrd16	ankyrin repeat domain 16	Chr2: 11.789753	9.92132	17.9	Chr3: 42.149120	-0.390212	68	0.000893566
1427934_at	Lyrm2	LYR motif containing 2	Chr4: 32.801822	9.84474	8.6	Chr3: 42.149120	-0.390193	68	0.000894149
1422132_at	Mthfr	5,10-methylenetetrahydrofolate reductase (hyperhomocysteinemia)	Chr4: 148.054985	6.7701	12	Chr4: 148.882237	0.390131	68	0.00089603
1433531_at	Acsl4	acyl-CoA synthetase long-chain family member 4	ChrX: 142.318180	9.48265	10.6	Chr10: 20.325682	-0.390027	68	0.000899224
1437317_at	Ube1l	ubiquitin-activating enzyme E1-like	Chr9: 107.983612	9.88226	14.9	Chr17: 31.632850	0.39002	68	0.000899454
1428551_at	Trmt11	tRNA methyltransferase 11 homolog	Chr10: 30.534740	9.5265	11.1	Chr18: 73.844688	-0.390006	68	0.00089986
1443161_at	Trps1	trichorhinophalangeal syndrome 1	Chr15: 50.773936	9.31651	66.9	Chr15: 48.804757	-0.389695	68	0.000909437
1426210_x_at	Parp3	poly (ADP-ribose) polymerase family, member 3	Chr9: 106.470699	6.5354	18.2	Chr9: 98.660590	-0.38953	68	0.00091457
1433545_s_at	Acad11	acyl-Coenzyme A dehydrogenase family, member 11	Chr9: 104.127137	9.96942	10.2	Chr15: 85.427091	-0.38948	68	0.00091612
1460119_at	BB245904	ESTs	--	5.77786	9.7	Chr5: 137.010795	-0.389471	68	0.000916393
1436761_s_at	1200015N20Rik	RIKEN cDNA 1200015N20	Chr10: 70.558576	7.20693	12.7	Chr4: 136.674648	-0.389427	68	0.000917778
1449435_at	B4galt3	UDP-Gal:betaGlcNAc beta 1,4-galactosyltransferase, polypeptide 3	Chr1: 171.276285	10.1883	8.9	Chr1: 188.518305	0.389307	68	0.000921534
1456577_x_at	Pitrm1	pitrilysin metalloprotease 1	Chr13: 6.579810	6.96877	12.6	Chr4: 155.225671	-0.389241	68	0.000923598
1419657_a_at	Slc25a36	solute carrier family 25, member 36 (mitochondrial carrier)	Chr9: 97.075602	10.8023	17.9	Chr4: 154.025994	-0.38912	68	0.000927401
1436235_x_at	4732471D19Rik	RIKEN cDNA 4732471D19 gene	Chr13: 54.550945	8.40545	16	Chr18: 82.377768	-0.389119	68	0.000927425
1435733_x_at	Rnaseh2c	Rnaseh2c ribonuclease H2, subunit C	Chr19: 5.602511	8.17262	17.5	Chr4: 88.554042	-0.388948	68	0.000932833
1426303_at	B4galt7	xylosylprotein beta1,4-galactosyltransferase, polypeptide 7 (galactosyltransferase I)	Chr13: 55.609867	6.23206	10.5	Chr7: 46.356949	-0.388947	68	0.000932864
1417715_a_at	Got2	glutamate oxaloacetate transaminase 2, mitochondrial	Chr8: 95.864193	12.3369	11.3	Chr1: 190.124682	0.388809	68	0.000937227
1448048_at	Nmrk1	nicotinamide riboside kinase 1	Chr19: 18.638513	5.82625	76	Chr19: 18.172211	-0.388783	68	0.000938049
1442338_at	Tnfrsf14	tumor necrosis factor receptor superfamily, member 14 (herpesvirus entry mediator)	Chr4: 154.918549	6.33117	49	Chr4: 155.225671	-0.388776	68	0.000938279
1435312_at	Mpra	metallophosphoesterase 1	Chr4: 134.509692	6.03132	89.1	Chr4: 133.964175	-0.388375	68	0.000951123
1437067_at	Phtf2	putative homeodomain transcription factor 2	Chr5: 20.758935	8.95406	10.5	Chr18: 82.377768	-0.388329	68	0.000952606
1439765_x_at	Krt42	keratin 42	Chr11: 100.262923	10.3169	10.4	Chr18: 82.377768	0.388287	68	0.000953959
1417564_at	Crsp9	cofactor required for Sp1 transcriptional activation, subunit 9	Chr11: 46.440947	10.3233	11.9	Chr4: 81.726726	-0.38827	68	0.000954504
1425428_at	Hif3a	hypoxia inducible factor 3, alpha subunit	Chr7: 17.031621	8.68773	16.1	Chr12: 70.716812	0.388238	68	0.000955544
1418625_s_at	Gapdh	glyceraldehyde-3-phosphate dehydrogenase (Chr 6 at 125.16 Mb)	Chr6: 125.162276	14.8948	12.2	Chr1: 190.124682	0.388223	68	0.000956031
1432999_at	6330414F14Rik	RIKEN cDNA 6330414F14 gene	Chr2: 76.028766	6.38111	15.7	Chr4: 88.807538	0.388076	68	0.000960813
1457473_at	Chd1	chromodomain helicase DNA binding protein 1	Chr17: 15.772323	9.21524	8.6	Chr10: 30.710842	-0.387952	68	0.000964836
1420136_a_at	4930587A11Rik	Mus musculus transcribed sequence with weak similarity to protein ref:NP_081764.1 (M.musculus) RIKEN cDNA 5730493B19 [Mus musculus]	Chr1: 23.287257	7.97482	38.7	Chr1: 23.152100	-0.38773	68	0.000972125
1440941_at	Rnf130	ring finger protein 130	Chr11: 50.121657	7.98999	11.2	Chr1: 181.548704	0.387483	68	0.000980265
1415889_a_at	Hsp90b1	heat shock protein 90, beta (Grp94), member 1 (tumor rejection antigen gp96)	Chr10: 86.691020	12.431	10.9	Chr4: 154.796059	-0.38696	68	0.000997711
1437832_x_at	Wars	tryptophanyl-tRNA synthetase	Chr12: 108.860062	9.91118	13.6	Chr12: 104.719074	0.38694	68	0.000998379
1458564_at	2810029C07Rik	RIKEN cDNA 2810029C07 gene	Chr19: 42.888893	6.13723	12.5	Chr4: 140.844690	0.38675	68	0.00100481
1438377_x_at	Slc13a3	solute carrier family 13 (sodium-dependent dicarboxylate transporter), member 3	Chr2: 165.405341	7.35956	11	Chr2: 131.557458	-0.386662	68	0.00100779
1434386_at	Atp2c1	ATPase, Ca++ transporting, type 2C, member 1	Chr9: 105.411503	10.6742	32.3	Chr9: 104.041112	-0.386544	68	0.00101178
1436116_x_at	Appl1	adaptor protein, phosphotyrosine interaction, PH domain and leucine zipper containing 1	Chr14: 26.922890	7.06593	9.6	Chr7: 134.834414	-0.386475	68	0.00101415
1422253_at	Col10a1	procollagen, type X, alpha 1	Chr10: 34.395638	6.63525	15.3	Chr4: 152.468585	0.386466	68	0.00101444
1438388_at	Nxph1	neurexophilin 1	Chr6: 9.249459	4.97997	10.5	Chr1: 43.609717	-0.38594	68	0.00103254
1424492_at	Trpc2	transient receptor potential cation channel, subfamily C, member 2	Chr7: 102.083183	9.24658	38.2	Chr7: 97.465336	0.38591	68	0.0010336
1456244_x_at	Txnl2	thioredoxin-like 2	Chr7: 137.468015	9.91831	14.1	Chr10: 19.937470	-0.385885	68	0.00103446
1435042_at	Sept7	septic 7 (cell division cycle 10 homolog)	Chr9: 25.251391	7.11974	12.4	Chr18: 75.696880	-0.385811	68	0.00103704
1447960_at	9630017O17	hypothetical protein 9630017O17	Chr9: 105.410082	5.69648	92.3	Chr9: 104.041112	-0.385788	68	0.00103783
1457483_at	Arid5b	AT rich interactive domain 5B (Mrf1 like)	Chr10: 68.220978	6.87959	101.8	Chr10: 67.616312	0.385668	68	0.00104202
1444542_at	A630026F21Rik	adult male aorta and vein cDNA, RIKEN full-length enriched library, clone:A530017F16 product:unknown EST, full insert sequence.	Chr4: 103.219197	7.03527	12.8	Chr3: 11.558690	-0.385622	68	0.00104364
1443377_at	Adam1a	a disintegrin and metalloproteinase domain 1a	Chr5: 121.518612	7.5604	10.8	Chr4: 22.236339	0.3847	68	0.00107637
1446464_at	Psme4	proteasome (prosome, macropain) activator subunit 4	Chr11: 30.832485	7.1605	12.8	Chr3: 28.336139	-0.384655	68	0.00107798
1452425_at	Tnfrsf14	tumor necrosis factor receptor superfamily, member 14 (herpesvirus entry mediator)	Chr4: 154.922090	6.27043	30.9	Chr4: 155.741797	0.384649	68	0.00107822
1456831_at	Arid5b	AT rich interactive domain 5B (Mrf1 like)	Chr10: 68.152649	7.57092	10.9	Chr1: 145.376780	0.384541	68	0.00108209
1426829_at	Uimc1	ubiquitin interaction motif containing 1	Chr13: 55.028381	10.2916	10	Chr4: 154.796059	-0.384445	68	0.00108557
1452616_s_at	Ssbp1	single-stranded DNA binding protein 1	Chr6: 40.472105	10.8276	9.4	Chr2: 114.197161	-0.384264	68	0.00109218
1434160_at	Zfp592	zinc finger protein 592	Chr7: 81.042133	9.40262	10.1	Chr14: 101.341425	0.38418	68	0.00109524
1420674_at	Pla2g2e	phospholipase A2, group IIE	Chr4: 138.880429	7.11336	57	Chr4: 138.255627	0.384002	68	0.00110177
1438592_at	Nek1	NIMA (never in mitosis gene a)-related expressed kinase 1 (serine/threonine kinase, polycystic kidney disease, axonal development)	Chr8: 61.053378	7.50634	10.8	Chr3: 42.149120	-0.383925	68	0.00110461
1438076_at	Rpl30	ribosomal protein L30	Chr15: 34.440703	7.9162	9.7	Chr2: 114.197161	-0.383752	68	0.00111098
1457451_at	Acvr2	ESTs, Highly similar to A39896 activin receptor precursor - mouse [M.musculus]	Chr2: 48.893313	6.38105	9.7	Chr5: 25.115971	-0.383752	68	0.00111101
1438821_at	Rfwd2	ring finger and WD repeat domain 2	Chr1: 159.273138	7.73332	9.4	Chr7: 134.834414	-0.383389	68	0.00112453
1455364_a_at	Rps7	ribosomal protein S7	Chr12: 28.635616	14.1047	11.2	Chr19: 16.881460	0.383226	68	0.00113061
1454236_a_at	C030004A17Rik	RIKEN cDNA C030004A17 gene	Chr9: 35.217686	8.88559	9.7	Chr13: 108.957958	-0.383179	68	0.00113239
1428915_at	Sirt5	sirtuin 5, mitochondrial, NAD-dependent deacetylase, class 3 (CPS1 deacetylase)	Chr13: 43.394828	9.25028	11	Chr2: 14.395051	-0.382976	68	0.00114009
1449333_at	Sf3a1	splicing factor 3a, subunit 1	Chr11: 4.180034	10.0957	13.7	Chr4: 81.726726	0.382721	68	0.00114978
1430578_at	Eif4g3	eukaryotic translation initiation factor 4 gamma, 3	Chr4: 138.126836	7.33045	91.4	Chr4: 136.674648	-0.382705	68	0.00115038
1456896_at	Kif1b	kinesin family member 1B	Chr4: 149.255224	10.412	11.7	Chr4: 148.882237	-0.382491	68	0.0011586
1440312_at	Elovl7	ELOVL family member 7, elongation of long chain fatty acids (yeast)	Chr13: 108.285109	7.36683	14.8	Chr13: 108.957958	-0.382377	68	0.00116299
1423625_a_at	1810055D05Rik	RIKEN cDNA 1810055D05 gene	Chr3: 34.079217	9.96483	11.1	Chr1: 192.154974	-0.382273	68	0.00116702
1415704_a_at	Cdv3	carnitine deficiency-associated gene expressed in ventricle 3	Chr9: 103.353157	11.2907	20.2	Chr10: 24.000000	-0.38187	68	0.00118271
1438079_at	Zfp867	zinc finger protein 867	Chr11: 59.461840	8.0456	14.5	Chr2: 104.099551	-0.381798	68	0.00118554
1416345_at	Timm8a1	translocase of inner mitochondrial membrane 8 (X-linked deafness dystonia protein)	ChrX: 134.537553	9.71001	9.3	Chr9: 99.822930	-0.381777	68	0.00118634
1436951_x_at	Txndc9	thioredoxin domain containing 9	Chr1: 37.987481	10.8175	74	Chr1: 38.394703	-0.381747	68	0.00118753
1439419_at	2310057M21Rik	RIKEN cDNA 2310057M21 gene	Chr7: 131.348500	6.0132	13.9	Chr7: 135.314535	-0.381561	68	0.00119486
1447009_at	C79657	ESTs	Chr2: 75.096681	6.07785	11.7	Chr11: 33.490349	0.381454	68	0.00119909
1439631_at	Zcchc11	zinc finger, CCHC domain containing 11	Chr4: 108.524440	7.2173	61.4	Chr4: 108.564497	-0.381121	68	0.00121236
1417707_at	N4bp2l1	NEDD4-binding protein 2-like 1	Chr5: 150.571763	8.89445	13.1	Chr12: 65.049772	-0.381004	68	0.00121709
1444582_at	4833420K19Rik	RIKEN cDNA 4833420K19 gene	Chr9: 7.207883	5.42376	15	Chr14: 103.565148	-0.380824	68	0.00122434
1442049_at	Trf	transferrin	Chr9: 103.213629	6.70273	16.4	Chr3: 53.246203	0.380732	68	0.00122803
1445924_at	Rex2	reduced expression 2	Chr4: 146.972322	5.54583	13.8	Chr13: 39.658241	-0.380542	68	0.00123576
1437955_at	4922504M18Rik	RIKEN cDNA 4922504M18 gene	Chr7: 104.148517	7.73985	14.5	Chr11: 120.956900	0.38029	68	0.00124607
1418207_at	Fxyd4	FXYD domain-containing ion transport regulator 4	Chr6: 117.933625	8.34582	20.2	Chr5: 102.623974	0.380158	68	0.00125151
1441424_at	Mfn2	mitofusin 2 (mitochondrial outer membrane large GTPase)	Chr4: 147.889103	5.75762	12.9	Chr19: 36.395869	-0.380134	68	0.0012525
1428193_at	Usp9x	ubiquitin specific protease 9, X chromosome	ChrX: 13.172754	10.7714	15.8	Chr12: 69.603797	-0.380109	68	0.00125354
1446103_at	2810425F24Rik	ESTs	Chr9: 66.867906	7.26783	11.7	Chr4: 56.198745	0.380082	68	0.00125465
1429728_at	4930429M06Rik	RIKEN cDNA 4930429M06Rik	Chr1: 97.786129	8.46589	14	Chr1: 145.376780	-0.380056	68	0.00125571
1459783_s_at	Cno	cappuccino	Chr5: 36.747691	9.35705	13.2	Chr5: 137.010795	-0.379778	68	0.00126725
1452097_a_at	Dusp7	dual specificity phosphatase 7	Chr9: 106.374967	9.34139	11.2	Chr3: 8.903411	0.379702	68	0.00127045
1448453_at	Hsd3b1	hydroxysteroid dehydrogenase-1, delta<5>-3-beta	Chr3: 98.852230	6.39784	11.7	Chr12: 104.719074	0.379584	68	0.00127538
1424736_at	Eef2	eukaryotic translation elongation factor 2	Chr10: 81.181938	13.6232	7.9	ChrX: 9.334336	0.379488	68	0.00127942
1429964_at	5031420N21Rik	RIKEN cDNA 5031420N21 gene	Chr9: 73.041785	6.37253	14.3	Chr4: 140.844690	0.379407	68	0.00128281
1425254_at	Foxn4	forkhead box N4	Chr5: 114.254179	8.38268	11.5	Chr19: 38.172042	0.379352	68	0.00128512
1429019_s_at	Pon2	paraoxonase 2 (astrocyte associated)	Chr6: 5.264697	10.5533	16.3	Chr4: 81.726726	-0.37921	68	0.00129114
1421011_at	Dhrs8	dehydrogenase/reductase (SDR family) member 8	Chr5: 103.990470	8.74041	15.2	Chr5: 135.879195	0.379043	68	0.00129823
1424908_at	Mtfmt	mitochondrial methionyl-tRNA formyltransferase	Chr9: 65.447224	8.40654	23.9	Chr9: 65.027384	-0.378811	68	0.00130813
1418244_at	Nat5	N-acetyltransferase 5 (ARD1 homolog, S. cerevisiae)	Chr2: 145.915890	11.0823	16.1	Chr4: 62.692342	-0.378616	68	0.00131653
1440781_at	Nck1	non-catalytic region of tyrosine kinase adaptor protein 1	Chr9: 100.500843	6.42318	57.6	Chr9: 100.022005	-0.378495	68	0.00132177
1420731_a_at	Csrp2	cysteine and glycine-rich protein 2	Chr10: 110.935268	9.47851	15.9	Chr7: 16.461335	-0.378455	68	0.00132351
1426497_at	Kdm5c	lysine (K)-specific demethylase 5C (X-linked mental retardation, jumonji, AT rich interactive domain 1C)	ChrX: 152.273210	7.20764	15.4	Chr4: 62.707256	0.378391	68	0.00132626
1450054_at	Add1	adducin 1 (alpha, calmodulin-binding, spectrin-actin network assembly protein)	Chr5: 34.631716	12.4471	11.5	Chr9: 99.205043	0.37828	68	0.00133112
1426304_x_at	B4galt7	xylosylprotein beta1,4-galactosyltransferase, polypeptide 7 (galactosyltransferase I)	Chr13: 55.609867	7.59546	9.4	Chr10: 30.710842	-0.378204	68	0.0013344
1453328_at	2700008G24Rik	RIKEN cDNA 2700008G24 gene	Chr14: 63.665588	8.16961	14.5	Chr10: 28.843564	-0.378143	68	0.00133706
1456544_at	Tmem38b	transmembrane protein 38B	Chr4: 53.861435	9.03083	11.9	Chr4: 155.225671	-0.378106	68	0.00133868
1455515_at	1810041L15Rik	pineal and eye KIAA1644 protein (highly expressed in pineal gland and eye)	Chr15: 84.379254	11.151	11.3	Chr15: 51.701250	0.378017	68	0.0013426
1449130_at	Cd1d1	CD1d1 antigen	Chr3: 86.995894	6.09151	14.9	Chr5: 135.879195	-0.377986	68	0.00134396
1436287_at	AK014119	AK014119 non-coding liver EST	Chr8: 65.028504	7.63042	22.7	Chr8: 72.545027	0.37792	68	0.00134687
1455024_at	Tlk1	tousled-like kinase 1	Chr2: 70.712530	10.3998	13.8	Chr4: 155.225671	-0.377888	68	0.00134827
1457626_at	Trim33	tripartite motif protein 33	Chr3: 103.296047	6.30692	12.9	Chr4: 153.232320	-0.377842	68	0.00135028
1429129_at	Lrrcc1	leucine rich repeat and coiled-coil domain containing 1	Chr3: 14.562959	7.58455	12	Chr2: 131.557458	-0.377767	68	0.0013536
1434104_at	6030458H05	hypothetical protein 6030458H05	Chr8: 72.481739	9.79266	16.7	Chr1: 151.271465	0.377688	68	0.0013571
1438094_x_at	Ola1	Obg-like ATPase 1 (GTP-binding protein PTD004)	Chr2: 73.093240	10.2665	11.7	Chr12: 65.049772	-0.377659	68	0.00135841
1457898_at	Kcnq5	potassium voltage-gated channel, subfamily Q, member 5 (M-current, slowly activating muscarinic acetylcholine receptor sensitive)	Chr1: 21.819142	7.16171	10.4	Chr3: 27.192039	-0.377403	68	0.00136981
1460660_x_at	Rer1	RER1 retention in endoplasmic reticulum 1 homolog (S. cerevisiae)	Chr4: 155.074112	10.362	38.6	Chr4: 155.225671	-0.377299	68	0.00137443
1438174_x_at	Ppp2r1a	protein phosphatase 2 (formerly 2A), regulatory subunit A (PR 65), alpha isoform	Chr17: 20.965713	12.3746	10.1	Chr1: 145.376780	0.377068	68	0.00138484
1416430_at	Cat	catalase	Chr2: 103.454053	10.4506	14.1	Chr10: 19.602720	-0.377016	68	0.0013872
1435735_x_at	H47	histocompatibility 47	Chr7: 66.089211	10.0546	14.8	Chr4: 88.554042	-0.376969	68	0.0013893
1433629_s_at	AI316787	expressed sequence AI316787	Chr11: 78.507133	9.81393	9.2	Chr10: 30.710842	-0.376969	68	0.00138931
1418355_at	Nucb2	nucleobindin 2 (nesfactin 1, obesity-associated)	Chr7: 116.533087	9.37257	14.5	Chr4: 56.198745	-0.376935	68	0.00139084
1458960_at	Ryk	RYK receptor-like tyrosine kinase	Chr9: 102.851934	6.23813	51.4	Chr9: 102.664577	0.37691	68	0.00139201
1435318_at	E130218I03Rik	eye expressed E130218I03Rik	Chr4: 134.245806	12.2273	170.7	Chr4: 133.964175	-0.376747	68	0.00139939
1435695_a_at	A030007L17Rik	RIKEN cDNA A030007L17 gene	Chr6: 54.985671	9.07023	17.8	Chr4: 88.554042	-0.376627	68	0.00140485
1422931_at	Fosl2	fos-like antigen 2	Chr5: 32.153140	8.72858	12	Chr2: 131.557458	0.376492	68	0.00141105
1432271_a_at	4833420K19Rik	RIKEN cDNA 4833420K19 gene	Chr9: 7.203263	9.67286	14.1	Chr4: 62.692342	-0.376454	68	0.0014128
1435350_at	Traf6	Tnf receptor-associated factor 6	Chr2: 101.701190	8.56507	9.1	Chr7: 66.068226	-0.376365	68	0.00141691
1435142_at	Sft2d2	SFT2 domain containing 2	Chr1: 165.175797	8.32701	48.9	Chr1: 163.338902	0.376281	68	0.00142079
1434461_at	Zfp715	zinc finger protein 715	Chr7: 43.296564	10.2514	13.5	Chr15: 97.576270	-0.376199	68	0.00142455
1427609_at	Sox14	SRY-box containing gene 14	Chr9: 99.874878	7.6867	10.3	Chr4: 149.906312	0.376192	68	0.00142488
1456512_at	1110017D07Rik	RIKEN cDNA 1110017D07 gene	Chr15: 92.770624	5.88817	13	Chr15: 94.266750	-0.376066	68	0.00143072
1454642_a_at	Commd3	COMM domain containing 3	Chr2: 18.674835	9.80757	13.6	Chr4: 88.554042	-0.375896	68	0.00143866
1443491_at	Ptprk	protein tyrosine phosphatase, receptor type, K	Chr10: 28.096489	8.32937	39.8	Chr10: 27.579570	0.375742	68	0.00144587
1432286_at	Pole4	RIKEN cDNA 5830430F06 gene	--	5.25705	12.2	ChrX: 138.022778	-0.375717	68	0.00144703
1452716_at	Fam213a	Fam213a family with sequence similarity 213, member A	Chr14: 40.993932	11.5156	27.2	Chr14: 40.617201	-0.375487	68	0.00145788
1455532_at	Atxn7l2	ataxin 7-like 2	Chr3: 108.203259	8.6706	14.8	Chr4: 75.824944	0.375437	68	0.00146024
1455184_at	Mob1b	MOB1, Mps One Binder kinase activator 1B	Chr5: 88.761467	9.84063	11.1	Chr9: 62.256039	-0.375423	68	0.00146089
1460713_at	BC048355	cDNA sequence BC048355	Chr17: 46.499084	8.35118	11.3	Chr4: 70.088532	0.375161	68	0.00147333
1455295_at	Slc38a7	solute carrier family 38, member 7	Chr8: 95.835981	8.72276	11.9	Chr4: 62.707256	0.375126	68	0.00147502
1445440_at	Ccdc88a	coiled coil domain containing 88A (hook-related protein 1, Galpha-interacting vesicle-associated protein)	Chr11: 29.467003	7.7225	13.4	Chr5: 137.010795	-0.37506	68	0.00147817
1435317_x_at	Psma6	proteasome (prosome, macropain) subunit, alpha type 6	Chr12: 55.418134	6.55429	11.3	Chr7: 107.292080	-0.374952	68	0.00148335
1452719_at	Zdhhc24	zinc finger, DHHC domain containing 24	Chr19: 4.884830	8.56346	15.7	Chr12: 104.393980	-0.374877	68	0.00148696
1439992_at	Mov10l1	Moloney leukemia virus 10-like 1	Chr9: 114.558256	6.90519	10.8	Chr11: 103.717493	0.374767	68	0.00149222
1429436_at	Prpf40a	formin binding protein 3	Chr2: 53.136851	8.40447	15.8	Chr5: 43.809706	-0.37466	68	0.00149739
1449255_a_at	Rpl15	ribosomal protein L15	Chr14: 18.269002	13.856	10.8	Chr18: 82.240604	0.374645	68	0.00149814
1425648_at	Rnf33	ring finger protein 32	Chr8: 64.999408	7.58247	17.9	Chr1: 80.325854	0.374374	68	0.0015113
1417462_at	Cap1	CAP, adenylate cyclase-associated protein 1	Chr4: 122.860065	9.75892	207.8	Chr4: 122.859566	0.374153	68	0.00152212
1418782_at	Rxrg	retinoid X receptor gamma	Chr1: 167.635723	8.72758	60.8	Chr1: 167.331141	0.37399	68	0.00153016
1421400_at	Kcnmb1	potassium large conductance calcium-activated channel, subfamily M, beta member 1 (modulatory subunit)	Chr11: 33.970439	6.7069	11	Chr4: 143.369823	0.373785	68	0.00154032
1452229_at	Spag7	sperm associated antigen 7	Chr11: 70.668687	7.40549	10.1	Chr2: 116.006377	0.373583	68	0.00155038
1433503_at	Zadh1	zinc binding alcohol dehydrogenase, domain containing 1	Chr12: 84.315313	10.0865	13.7	Chr12: 104.393980	-0.373489	68	0.00155508
1418772_at	Fam208b	family with sequence similarity 208, member B (peripherial benzodiazepine receptor associated)	Chr13: 3.566205	9.67875	8.8	Chr19: 4.262698	-0.373331	68	0.001563
1455700_at	Mterfd3	transcription termination factor-like protein	Chr10: 85.119494	9.30959	14.8	Chr2: 103.450499	-0.3733	68	0.00156456
1458444_at	AV145217	AV145217	Chr8: 117.212395	6.83648	14.5	Chr2: 114.197161	0.373252	68	0.00156698
1456917_at	Arfgef1	ADP-ribosylation factor guanine nucleotide-exchange factor 1(brefeldin A-inhibited)	Chr1: 10.182871	8.73757	11.6	Chr14: 78.383350	-0.37315	68	0.00157211
1431466_at	4930553D19Rik	RIKEN cDNA 4930553D19 gene	Chr12: 71.121873	6.46109	17.3	Chr4: 155.493057	0.373112	68	0.00157403
1422482_at	Ruvbl2	RuvB-like protein 2	Chr7: 45.421976	10.7521	9.3	Chr9: 98.660590	0.373085	68	0.00157541
1433036_at	4930564B12Rik	RIKEN cDNA 4930564B12 gene	Chr12: 106.448820	7.38233	12.2	Chr4: 148.882237	0.373019	68	0.00157873
1433422_at	Nr4a2	nuclear receptor subfamily 4, group A, member 2	Chr2: 57.123456	7.36069	10.8	Chr4: 88.807538	0.372854	68	0.00158716
1449090_a_at	Yes1	Yamaguchi sarcoma viral (v-yes) oncogene homolog 1	Chr5: 32.686555	9.07471	11.3	Chr10: 19.937470	-0.372651	68	0.00159752
1455587_at	BC030183	cDNA sequence BC030183	Chr4: 129.576834	6.93491	20	Chr4: 126.716711	0.372406	68	0.00161014
1426227_s_at	Vps37c	vacuolar protein sorting 37C	Chr19: 10.714140	9.80064	32.3	Chr19: 10.714325	0.372248	68	0.0016183
1438110_at	Zbtb1	zinc finger and BTB domain containing 1	Chr12: 76.396529	7.40007	28.6	Chr12: 76.378311	-0.372242	68	0.00161864
1424420_at	Ccpg1	cell cycle progression 1	Chr9: 73.013357	9.97782	8.7	Chr3: 144.672147	-0.37223	68	0.00161922
1439261_x_at	1500032H18Rik	RIKEN cDNA 1500032H18 gene	Chr1: 37.878961	5.26038	11	Chr12: 65.049772	-0.372198	68	0.00162091
1428582_at	2010208K18Rik	RIKEN cDNA 2010208K18 gene	Chr7: 94.475606	9.67419	10.9	Chr2: 113.445288	-0.372198	68	0.00162092
1459631_at	Rps12	ribosomal protein S12	--	6.55465	14.3	Chr2: 131.056131	0.372099	68	0.00162606
1433960_at	Isg20l2	interferon stimulated exonuclease gene 20-like 2	Chr3: 87.940221	9.15679	11.5	Chr10: 19.937470	-0.371825	68	0.00164041
1446290_at	2410129H14Rik	RIKEN cDNA 2410129H14 gene	Chr14: 99.044236	5.49502	16.1	Chr2: 106.279658	-0.371811	68	0.00164112
1439834_at	2400009B08Rik	RIKEN cDNA 2400009B08 non-coding	Chr8: 3.671234	5.92783	11.1	Chr5: 24.321400	-0.371777	68	0.00164289
1428152_a_at	Rpl18a	ribosomal protein L18A	Chr8: 70.895450	14.3331	8.4	Chr10: 30.710842	0.371644	68	0.00164989
1438310_at	Dgkh	diacylglycerol kinase, eta	Chr14: 78.559477	10.0365	26.5	Chr14: 81.380779	-0.371633	68	0.0016505
1423931_s_at	Anapc4	anaphase promoting complex subunit 4	Chr5: 52.865939	11.2894	13.1	Chr5: 45.288181	-0.371569	68	0.00165389
1449478_at	Mmp7	matrix metalloproteinase 7	Chr9: 7.696057	8.3085	11.3	Chr11: 61.324742	0.371195	68	0.00167377
1459762_x_at	Wdr12	WD repeat domain 12	--	5.15376	13.8	Chr1: 145.376780	-0.371152	68	0.0016761
1458566_at	Gpatc2	G patch domain containing 2	Chr1: 187.343191	8.83889	15.2	Chr5: 137.010795	-0.371109	68	0.00167836
1436223_at	Itgb8	integrin beta 8	Chr12: 119.158108	11.6671	9.8	ChrX: 84.597186	-0.37101	68	0.0016837
1428236_at	Acbd5	acyl-Coenzyme A binding domain containing 5	Chr2: 23.114022	11.0073	16.8	Chr2: 112.284850	-0.3709	68	0.00168963
1455795_at	Sart2	squamous cell carcinoma antigen recognized by T cells 2	Chr10: 34.151534	6.36012	10.5	Chr5: 24.371012	-0.370888	68	0.00169024
1451221_at	Kiaa0947	uncharacterized protein KIAA0947 with high CNS expression	Chr13: 70.589086	9.50156	19.9	Chr12: 69.603797	-0.370879	68	0.00169075
1437419_at	Bmp2k	BMP2 inducible kinase	Chr5: 97.069122	7.31709	9.5	Chr3: 145.800515	-0.370785	68	0.00169581
1419898_s_at	Zc3h7	zinc finger CCCH type containing 7	Chr16: 11.137051	9.37058	18.7	Chr12: 65.049772	-0.370524	68	0.00171001
1444437_at	Usp34	ubiquitin specific protease 34	Chr11: 23.456144	7.87036	13.7	Chr2: 103.450499	-0.370489	68	0.00171192
1439640_at	AV381105	adult male epididymis cDNA, RIKEN full-length enriched library, clone:9230108E01 product:unknown EST, full insert sequence.	Chr4: 136.358870	8.96508	62.5	Chr4: 135.992747	-0.370447	68	0.0017142
1448679_at	Hyal2	hyaluronidase 2	Chr9: 107.572294	9.05934	12.5	Chr15: 97.576270	0.370362	68	0.00171886
1451893_s_at	Baiap1	brain-specific angiogenesis inhibitor 3	Chr6: 93.678110	8.48477	13.2	Chr4: 141.615125	-0.370272	68	0.00172377
1438383_x_at	Ppp2r1a	protein phosphatase 2 (formerly 2A), regulatory subunit A (PR 65), alpha isoform	Chr17: 20.965747	13.5157	12.6	Chr18: 82.377768	0.370231	68	0.00172603
1433537_at	Atrx	alpha thalassemia/mental retardation syndrome X-linked	ChrX: 105.797655	11.4476	9.7	Chr14: 78.286799	-0.370123	68	0.00173197
1436540_at	6720427I07Rik	RIKEN cDNA 6720427I07	Chr13: 48.535555	10.373	10.3	Chr3: 53.246203	-0.3701	68	0.00173324
Funding for The GeneNetwork: NIAAA (U01AA13499, U24AA13513), NIDA, NIMH, and NIAAA (P20-DA21131), NCI MMHCC (U01CA105417), and NCRR (U01NR 105417)
PLEASE RETAIN DATA SOURCE INFORMATION WHENEVER POSSIBLE
