# Supplementary material for: A Topological Cluster of Differentially Regulated Genes in Mice Lacking PER3
Source: Front Mol Neurosci. 2020 Feb 13;13:15. doi: 10.3389/fnmol.2020.00015 (PMC7031657; doi:10.3389/fnmol.2020.00015)
Supplement: Supplementary file 7 [file Table_7.XLSX]

## Sheet: enrichment_results_wg_result156
Data file S7. Top 40 significant biological processes and molecular functions (FDR<0.05) for top 500 transcripts whose expression covaries with Per3 in BXD mice data for the eye.
geneSet	description	link	size	overlap	expect	enrichmentRatio	pValue	FDR	userId
GO:0019900	kinase binding	http://amigo.geneontology.org/amigo/term/GO:0019900	767	31	10.7928	2.8723	1.38625e-07	0.00150491	Per3;Kif1b;Mtor;Trib1;Casp9;Pink1;Bicd1;Ptn;Camk2n1;Cdc42;Fzd5;Smad1;Ppp2ca;Midn;Akt1;Prkaca;Arhgdia;Rhobtb1;Ppp1r12a;Ccne2;Becn1;Wars;Appl1;Rps7;Eef2;Nck1;Traf6;Ptprk;Mob1b;Ccdc88a;Hyal2
GO:0009411	response to UV	http://amigo.geneontology.org/amigo/term/GO:0009411	134	12	1.88557	6.36414	4.34691e-07	0.0023595	Ube4b;Casp9;Ptn;Trp53inp1;Cat;Sdf4;Akt1;Ercc3;Ptprk;Ruvbl2;Zbtb1;Hyal2
GO:0035639	purine ribonucleoside triphosphate binding	http://amigo.geneontology.org/amigo/term/GO:0035639	1719	49	24.1887	2.02574	1.40924e-06	0.00331704	Kif1b;Mtor;Ube4b;Clcn6;Trib1;Clk4;Pink1;Ube2j2;Pank1;Cdkl2;Rab6b;Atp11c;Cdc42;Rab2a;Rtel1;Alpk2;Prpf4b;Mfn2;Lats2;Limk1;Akt1;Prkaca;Mmab;Ercc3;Txk;Rhobtb1;Atrx;Pik3r4;Atp8a1;Arf4;Srpr;Rad54l;Acsl4;Nmrk1;Chd1;Hsp90b1;Wars;Atp2c1;Sept7;Nek1;Eef2;Tlk1;Ola1;Ryk;Mov10l1;Ruvbl2;Yes1;Dgkh;Bmp2k
GO:0019901	protein kinase binding	http://amigo.geneontology.org/amigo/term/GO:0019901	687	27	9.66705	2.79299	1.59951e-06	0.00331704	Mtor;Trib1;Casp9;Pink1;Bicd1;Ptn;Camk2n1;Cdc42;Fzd5;Smad1;Ppp2ca;Akt1;Prkaca;Arhgdia;Rhobtb1;Ppp1r12a;Ccne2;Becn1;Wars;Appl1;Rps7;Eef2;Nck1;Traf6;Ptprk;Ccdc88a;Hyal2
GO:0032555	purine ribonucleotide binding	http://amigo.geneontology.org/amigo/term/GO:0032555	1789	50	25.1737	1.9862	1.90452e-06	0.00331704	Kif1b;Mtor;Ube4b;Clcn6;Trib1;Clk4;Pink1;Ube2j2;Pank1;Cdkl2;Rab6b;Atp11c;Cdc42;Rab2a;Rtel1;Alpk2;Prpf4b;Mfn2;Lats2;Limk1;Akt1;Prkaca;Mmab;Ercc3;Txk;Rhobtb1;Atrx;Pik3r4;Atp8a1;Arf4;Srpr;Rad54l;Acsl4;Nmrk1;Chd1;Hsp90b1;Wars;Atp2c1;Sept7;Nek1;Eef2;Tlk1;Ola1;Ryk;Mov10l1;Ruvbl2;Yes1;Dgkh;Acbd5;Bmp2k
GO:0017076	purine nucleotide binding	http://amigo.geneontology.org/amigo/term/GO:0017076	1801	50	25.3426	1.97296	2.30672e-06	0.00331704	Kif1b;Mtor;Ube4b;Clcn6;Trib1;Clk4;Pink1;Ube2j2;Pank1;Cdkl2;Rab6b;Atp11c;Cdc42;Rab2a;Rtel1;Alpk2;Prpf4b;Mfn2;Lats2;Limk1;Akt1;Prkaca;Mmab;Ercc3;Txk;Rhobtb1;Atrx;Pik3r4;Atp8a1;Arf4;Srpr;Rad54l;Acsl4;Nmrk1;Chd1;Hsp90b1;Wars;Atp2c1;Sept7;Nek1;Eef2;Tlk1;Ola1;Ryk;Mov10l1;Ruvbl2;Yes1;Dgkh;Acbd5;Bmp2k
GO:0032553	ribonucleotide binding	http://amigo.geneontology.org/amigo/term/GO:0032553	1804	50	25.3848	1.96968	2.419e-06	0.00331704	Kif1b;Mtor;Ube4b;Clcn6;Trib1;Clk4;Pink1;Ube2j2;Pank1;Cdkl2;Rab6b;Atp11c;Cdc42;Rab2a;Rtel1;Alpk2;Prpf4b;Mfn2;Lats2;Limk1;Akt1;Prkaca;Mmab;Ercc3;Txk;Rhobtb1;Atrx;Pik3r4;Atp8a1;Arf4;Srpr;Rad54l;Acsl4;Nmrk1;Chd1;Hsp90b1;Wars;Atp2c1;Sept7;Nek1;Eef2;Tlk1;Ola1;Ryk;Mov10l1;Ruvbl2;Yes1;Dgkh;Acbd5;Bmp2k
GO:0009314	response to radiation	http://amigo.geneontology.org/amigo/term/GO:0009314	424	20	5.96627	3.35218	2.64497e-06	0.00331704	Per3;Mtor;Ube4b;Lzic;Casp9;Ptn;Trp53inp1;Jund;Cat;Sdf4;Gnb1;Akt1;Ercc3;Rad54l;Uimc1;Nek1;Ptprk;Ruvbl2;Zbtb1;Hyal2
GO:0043422	protein kinase B binding	http://amigo.geneontology.org/amigo/term/GO:0043422	17	5	0.239214	20.9018	2.86517e-06	0.00331704	Pink1;Ppp2ca;Appl1;Traf6;Ccdc88a
GO:0009416	response to light stimulus	http://amigo.geneontology.org/amigo/term/GO:0009416	285	16	4.01035	3.98968	3.05549e-06	0.00331704	Per3;Mtor;Ube4b;Casp9;Ptn;Trp53inp1;Jund;Cat;Sdf4;Gnb1;Akt1;Ercc3;Ptprk;Ruvbl2;Zbtb1;Hyal2
GO:0034613	cellular protein localization	http://amigo.geneontology.org/amigo/term/GO:0034613	1590	45	22.3735	2.01131	4.93993e-06	0.00487526	Vamp3;Kif1b;Vps13d;Stx12;Npc1;Pink1;Bicd1;Timm9;Ptn;Rab6b;Nr5a1;Cdc42;Rab2a;Rer1;Trim28;Vps26c;Fyttd1;Ppp2ca;Mfn2;Crkl;Lats2;Gga1;Ap4s1;Akt1;Zdhhc18;Prkaca;Stx11;Thoc1;Atrx;Pik3r4;Hgs;Ccne2;Arf4;Srpr;Becn1;Parp3;Hsp90b1;Appl1;Timm8a1;Tlk1;Ptprk;Ccdc88a;Zdhhc24;Ruvbl2;Hyal2
GO:0070727	cellular macromolecule localization	http://amigo.geneontology.org/amigo/term/GO:0070727	1600	45	22.5142	1.99874	5.81096e-06	0.00525698	Vamp3;Kif1b;Vps13d;Stx12;Npc1;Pink1;Bicd1;Timm9;Ptn;Rab6b;Nr5a1;Cdc42;Rab2a;Rer1;Trim28;Vps26c;Fyttd1;Ppp2ca;Mfn2;Crkl;Lats2;Gga1;Ap4s1;Akt1;Zdhhc18;Prkaca;Stx11;Thoc1;Atrx;Pik3r4;Hgs;Ccne2;Arf4;Srpr;Becn1;Parp3;Hsp90b1;Appl1;Timm8a1;Tlk1;Ptprk;Ccdc88a;Zdhhc24;Ruvbl2;Hyal2
GO:0045935	positive regulation of nucleobase-containing compound metabolic process	http://amigo.geneontology.org/amigo/term/GO:0045935	1787	48	25.1456	1.90888	9.32456e-06	0.00778672	Casz1;Prdm16;Mtor;Prdm2;Padi2;Dpf2;Utp15;Tnfrsf1b;Pink1;Trp53inp1;Tbx5;Jund;Rere;Nr5a1;Cdc42;Fzd5;Rtel1;Trim28;Smad1;Zfp326;Elk4;Akt1;Thoc1;Ercc3;Txk;Sox10;Nfib;Atrx;Ppp1r12a;Tcf12;Arf4;Parp3;Hif3a;Arid5b;Uimc1;Trf;Usp9x;Foxn4;Nck1;Fosl2;Traf6;Zfp715;Rxrg;Ruvbl2;Nr4a2;Yes1;Ccpg1;Hyal2
GO:0009628	response to abiotic stimulus	http://amigo.geneontology.org/amigo/term/GO:0009628	1085	34	15.2675	2.22696	1.03947e-05	0.00806037	Per3;Agtrap;Mtor;Ube4b;Clcn6;Lzic;Casp9;Hspb7;Pink1;Ptn;Trp53inp1;Jund;Cat;Sdf4;Atxn3;Ece1;Gnb1;Akt1;Prkaca;Ercc3;Arhgdia;Hp1bp3;Rad54l;Becn1;Hif3a;Hsp90b1;Uimc1;Nek1;Fosl2;Ptprk;Ruvbl2;Nr4a2;Zbtb1;Hyal2
GO:0005524	ATP binding	http://amigo.geneontology.org/amigo/term/GO:0005524	1396	40	19.6437	2.03628	1.34745e-05	0.00975194	Kif1b;Mtor;Ube4b;Clcn6;Trib1;Clk4;Pink1;Ube2j2;Pank1;Cdkl2;Atp11c;Rtel1;Alpk2;Prpf4b;Lats2;Limk1;Akt1;Prkaca;Mmab;Ercc3;Txk;Atrx;Pik3r4;Atp8a1;Rad54l;Acsl4;Nmrk1;Chd1;Hsp90b1;Wars;Atp2c1;Nek1;Tlk1;Ola1;Ryk;Mov10l1;Ruvbl2;Yes1;Dgkh;Bmp2k
GO:0010557	positive regulation of macromolecule biosynthetic process	http://amigo.geneontology.org/amigo/term/GO:0010557	1765	47	24.836	1.89241	1.47128e-05	0.00997561	Casz1;Prdm16;Mtor;Prdm2;Padi2;Eif4g3;Dpf2;Utp15;Pink1;Trp53inp1;Tbx5;Jund;Rere;Nr5a1;Cdc42;Fzd5;Trim28;Smad1;Zfp326;Elk4;Akt1;Thoc1;Ercc3;Txk;Sox10;Nfib;Atrx;Ppp1r12a;Tcf12;Arf4;Hif3a;Arid5b;Trf;Eef2;Foxn4;Nck1;Cd1d1;Fosl2;Traf6;Zfp715;Rxrg;Arfgef1;Ruvbl2;Nr4a2;Yes1;Ccpg1;Hyal2
GO:0032559	adenyl ribonucleotide binding	http://amigo.geneontology.org/amigo/term/GO:0032559	1456	41	20.4879	2.00118	1.56213e-05	0.00997561	Kif1b;Mtor;Ube4b;Clcn6;Trib1;Clk4;Pink1;Ube2j2;Pank1;Cdkl2;Atp11c;Rtel1;Alpk2;Prpf4b;Lats2;Limk1;Akt1;Prkaca;Mmab;Ercc3;Txk;Atrx;Pik3r4;Atp8a1;Rad54l;Acsl4;Nmrk1;Chd1;Hsp90b1;Wars;Atp2c1;Nek1;Tlk1;Ola1;Ryk;Mov10l1;Ruvbl2;Yes1;Dgkh;Acbd5;Bmp2k
GO:0001666	response to hypoxia	http://amigo.geneontology.org/amigo/term/GO:0001666	291	15	4.09477	3.6632	1.72348e-05	0.0103945	Agtrap;Mtor;Pink1;Ptn;Cat;Ece1;Gnb1;Akt1;Ercc3;Hp1bp3;Becn1;Hif3a;Hsp90b1;Fosl2;Nr4a2
GO:0030554	adenyl nucleotide binding	http://amigo.geneontology.org/amigo/term/GO:0030554	1467	41	20.6427	1.98617	1.86269e-05	0.0106428	Kif1b;Mtor;Ube4b;Clcn6;Trib1;Clk4;Pink1;Ube2j2;Pank1;Cdkl2;Atp11c;Rtel1;Alpk2;Prpf4b;Lats2;Limk1;Akt1;Prkaca;Mmab;Ercc3;Txk;Atrx;Pik3r4;Atp8a1;Rad54l;Acsl4;Nmrk1;Chd1;Hsp90b1;Wars;Atp2c1;Nek1;Tlk1;Ola1;Ryk;Mov10l1;Ruvbl2;Yes1;Dgkh;Acbd5;Bmp2k
GO:0036293	response to decreased oxygen levels	http://amigo.geneontology.org/amigo/term/GO:0036293	301	15	4.23549	3.5415	2.55613e-05	0.0136544	Agtrap;Mtor;Pink1;Ptn;Cat;Ece1;Gnb1;Akt1;Ercc3;Hp1bp3;Becn1;Hif3a;Hsp90b1;Fosl2;Nr4a2
GO:0010628	positive regulation of gene expression	http://amigo.geneontology.org/amigo/term/GO:0010628	1861	48	26.1869	1.83298	2.68633e-05	0.0136544	Kif1b;Casz1;Prdm16;Mtor;Prdm2;Padi2;Eif4g3;Dpf2;Utp15;Pink1;Trp53inp1;Tbx5;Camk2n1;Jund;Nr5a1;Fzd5;Trim28;Smad1;Zfp326;Elk4;Akt1;Thoc1;Ercc3;Txk;Sox10;Nfib;Atrx;Ppp1r12a;Hgs;Tcf12;Arf4;Hif3a;Wars;Rps7;Trf;Eef2;Foxn4;Nck1;Fosl2;Traf6;Zfp715;Rxrg;Ruvbl2;Nr4a2;Yes1;Ccpg1;Itgb8;Hyal2
GO:0044389	ubiquitin-like protein ligase binding	http://amigo.geneontology.org/amigo/term/GO:0044389	304	15	4.2777	3.50655	2.86711e-05	0.0136544	Per3;Trib1;Tnfrsf1b;Pink1;Ube2j2;Fzd5;Trim28;Mfn2;Atxn3;Prkaca;Hgs;Becn1;Tnfrsf14;Usp9x;Traf6
GO:0031641	regulation of myelination	http://amigo.geneontology.org/amigo/term/GO:0031641	43	6	0.60507	9.91621	2.89288e-05	0.0136544	Mtor;Tnfrsf1b;Akt1;Sox10;Trf;Rxrg
GO:0006886	intracellular protein transport	http://amigo.geneontology.org/amigo/term/GO:0006886	857	28	12.0592	2.32188	3.19368e-05	0.0144461	Vps13d;Stx12;Pink1;Timm9;Rab6b;Cdc42;Rab2a;Trim28;Vps26c;Fyttd1;Ppp2ca;Mfn2;Gga1;Ap4s1;Akt1;Zdhhc18;Prkaca;Stx11;Thoc1;Pik3r4;Hgs;Arf4;Srpr;Hsp90b1;Timm8a1;Tlk1;Zdhhc24;Hyal2
GO:0016773	phosphotransferase activity, alcohol group as acceptor	http://amigo.geneontology.org/amigo/term/GO:0016773	682	24	9.59669	2.50086	3.78717e-05	0.0164454	Mtor;Trib1;Clk4;Pink1;Pank1;Cdkl2;Trim28;Alpk2;Prpf4b;Lats2;Limk1;Akt1;Prkaca;Ercc3;Txk;Pik3r4;Ccne2;Nmrk1;Nek1;Tlk1;Ryk;Yes1;Dgkh;Bmp2k
GO:0033554	cellular response to stress	http://amigo.geneontology.org/amigo/term/GO:0033554	1674	44	23.5555	1.86793	3.94096e-05	0.016455	Mtor;Ube4b;Trib1;Casp9;Faap20;Tnfrsf1b;Pink1;Ptn;Trp53inp1;Ube2j2;Psme4;Cdc42;Fzd5;Rtel1;Trim28;Mfn2;Atxn3;Gnb1;Akt1;Prkaca;Thoc1;Ercc3;Atrx;Mpv17;Hp1bp3;Pik3r4;Tnfrsf19;Huwe1;Rad54l;Becn1;Parp3;Hsp90b1;Trpc2;Uimc1;Nek1;Trf;Eef2;Nck1;Tlk1;Traf6;Ptprk;Ruvbl2;Nr4a2;Zbtb1
GO:1903508	positive regulation of nucleic acid-templated transcription	http://amigo.geneontology.org/amigo/term/GO:1903508	1520	41	21.3885	1.91692	4.20644e-05	0.0165531	Casz1;Prdm16;Mtor;Prdm2;Padi2;Dpf2;Utp15;Trp53inp1;Tbx5;Jund;Rere;Nr5a1;Fzd5;Trim28;Smad1;Zfp326;Elk4;Akt1;Thoc1;Ercc3;Txk;Sox10;Nfib;Atrx;Ppp1r12a;Tcf12;Arf4;Hif3a;Arid5b;Trf;Foxn4;Nck1;Fosl2;Traf6;Zfp715;Rxrg;Ruvbl2;Nr4a2;Yes1;Ccpg1;Hyal2
GO:1902680	positive regulation of RNA biosynthetic process	http://amigo.geneontology.org/amigo/term/GO:1902680	1521	41	21.4026	1.91566	4.2694e-05	0.0165531	Casz1;Prdm16;Mtor;Prdm2;Padi2;Dpf2;Utp15;Trp53inp1;Tbx5;Jund;Rere;Nr5a1;Fzd5;Trim28;Smad1;Zfp326;Elk4;Akt1;Thoc1;Ercc3;Txk;Sox10;Nfib;Atrx;Ppp1r12a;Tcf12;Arf4;Hif3a;Arid5b;Trf;Foxn4;Nck1;Fosl2;Traf6;Zfp715;Rxrg;Ruvbl2;Nr4a2;Yes1;Ccpg1;Hyal2
GO:0070482	response to oxygen levels	http://amigo.geneontology.org/amigo/term/GO:0070482	321	15	4.51692	3.32085	5.34362e-05	0.0198661	Agtrap;Mtor;Pink1;Ptn;Cat;Ece1;Gnb1;Akt1;Ercc3;Hp1bp3;Becn1;Hif3a;Hsp90b1;Fosl2;Nr4a2
GO:1901700	response to oxygen-containing compound	http://amigo.geneontology.org/amigo/term/GO:1901700	1591	42	22.3876	1.87604	5.4899e-05	0.0198661	Kif1b;Agtrap;Mtor;Prdm2;Trib1;Casp9;Tnfrsf1b;Pink1;Ptn;Trp53inp1;Jund;Nr5a1;Cat;Gpr27;Ppp2ca;Crkl;Sdf4;Plaa;Akt1;Prkaca;Sox10;Mest;Rgs9;Mpv17;Becn1;Got2;Hsp90b1;Appl1;Hsd3b1;Eef2;Nck1;Add1;Nucb2;Fosl2;Traf6;Ptprk;Rpl15;Kcnmb1;Ruvbl2;Nr4a2;Yes1;Hyal2
GO:0031328	positive regulation of cellular biosynthetic process	http://amigo.geneontology.org/amigo/term/GO:0031328	1865	47	26.2431	1.79094	5.87085e-05	0.0205594	Casz1;Prdm16;Mtor;Prdm2;Padi2;Eif4g3;Dpf2;Utp15;Pink1;Trp53inp1;Tbx5;Jund;Rere;Nr5a1;Cdc42;Fzd5;Trim28;Smad1;Zfp326;Elk4;Akt1;Thoc1;Ercc3;Txk;Sox10;Nfib;Atrx;Ppp1r12a;Tcf12;Arf4;Hif3a;Arid5b;Trf;Eef2;Foxn4;Nck1;Cd1d1;Fosl2;Traf6;Zfp715;Rxrg;Arfgef1;Ruvbl2;Nr4a2;Yes1;Ccpg1;Hyal2
GO:0042886	amide transport	http://amigo.geneontology.org/amigo/term/GO:0042886	1714	44	24.1184	1.82434	6.862e-05	0.0231743	Vamp3;Vps13d;Pdpn;Tnfrsf1b;Stx12;Pink1;Timm9;Rab6b;Cdc42;Rab2a;Fzd5;Trim28;Vps26c;Cog4;Fyttd1;Gpr27;Ppp2ca;Midn;Mfn2;Gga1;Ap4s1;Akt1;Zdhhc18;Prkaca;Stx11;Thoc1;Rufy1;Pik3r4;Hgs;Arf4;Srpr;Vta1;Tnfrsf14;Hsp90b1;Timm8a1;Tlk1;Nucb2;Traf6;Sft2d2;Slc38a7;Zdhhc24;Arfgef1;Vps37c;Hyal2
GO:0051254	positive regulation of RNA metabolic process	http://amigo.geneontology.org/amigo/term/GO:0051254	1609	42	22.6409	1.85505	7.07876e-05	0.0231743	Casz1;Prdm16;Mtor;Prdm2;Padi2;Dpf2;Utp15;Tnfrsf1b;Trp53inp1;Tbx5;Jund;Rere;Nr5a1;Fzd5;Trim28;Smad1;Zfp326;Elk4;Akt1;Thoc1;Ercc3;Txk;Sox10;Nfib;Atrx;Ppp1r12a;Tcf12;Arf4;Hif3a;Arid5b;Trf;Foxn4;Nck1;Fosl2;Traf6;Zfp715;Rxrg;Ruvbl2;Nr4a2;Yes1;Ccpg1;Hyal2
GO:0045893	positive regulation of transcription, DNA-templated	http://amigo.geneontology.org/amigo/term/GO:0045893	1453	39	20.4457	1.90749	7.35874e-05	0.0231743	Casz1;Prdm16;Mtor;Prdm2;Padi2;Dpf2;Utp15;Trp53inp1;Tbx5;Jund;Nr5a1;Fzd5;Trim28;Smad1;Zfp326;Elk4;Akt1;Thoc1;Ercc3;Txk;Sox10;Nfib;Atrx;Ppp1r12a;Tcf12;Arf4;Hif3a;Trf;Foxn4;Nck1;Fosl2;Traf6;Zfp715;Rxrg;Ruvbl2;Nr4a2;Yes1;Ccpg1;Hyal2
GO:0031625	ubiquitin protein ligase binding	http://amigo.geneontology.org/amigo/term/GO:0031625	293	14	4.12292	3.39565	7.47145e-05	0.0231743	Per3;Trib1;Tnfrsf1b;Pink1;Ube2j2;Fzd5;Trim28;Mfn2;Atxn3;Prkaca;Becn1;Tnfrsf14;Usp9x;Traf6
GO:0004672	protein kinase activity	http://amigo.geneontology.org/amigo/term/GO:0004672	583	21	8.20362	2.55985	8.44217e-05	0.0254578	Mtor;Trib1;Clk4;Pink1;Cdkl2;Trim28;Alpk2;Prpf4b;Lats2;Limk1;Akt1;Prkaca;Ercc3;Txk;Pik3r4;Ccne2;Nek1;Tlk1;Ryk;Yes1;Bmp2k
GO:0034644	cellular response to UV	http://amigo.geneontology.org/amigo/term/GO:0034644	75	7	1.05535	6.63284	8.8739e-05	0.0260365	Casp9;Ptn;Trp53inp1;Ptprk;Ruvbl2;Zbtb1;Hyal2
GO:0009891	positive regulation of biosynthetic process	http://amigo.geneontology.org/amigo/term/GO:0009891	1904	47	26.7919	1.75426	9.68046e-05	0.0276555	Casz1;Prdm16;Mtor;Prdm2;Padi2;Eif4g3;Dpf2;Utp15;Pink1;Trp53inp1;Tbx5;Jund;Rere;Nr5a1;Cdc42;Fzd5;Trim28;Smad1;Zfp326;Elk4;Akt1;Thoc1;Ercc3;Txk;Sox10;Nfib;Atrx;Ppp1r12a;Tcf12;Arf4;Hif3a;Arid5b;Trf;Eef2;Foxn4;Nck1;Cd1d1;Fosl2;Traf6;Zfp715;Rxrg;Arfgef1;Ruvbl2;Nr4a2;Yes1;Ccpg1;Hyal2
GO:0045184	establishment of protein localization	http://amigo.geneontology.org/amigo/term/GO:0045184	1742	44	24.5124	1.79501	9.96542e-05	0.0277397	Vamp3;Vps13d;Tnfrsf1b;Stx12;Npc1;Pink1;Timm9;Rab6b;Cdc42;Rab2a;Fzd5;Trim28;Vps26c;Cog4;Fyttd1;Gpr27;Ppp2ca;Midn;Mfn2;Gga1;Phldb2;Ap4s1;Akt1;Zdhhc18;Prkaca;Stx11;Thoc1;Rufy1;Pik3r4;Hgs;Arf4;Srpr;Vta1;Tnfrsf14;Hsp90b1;Timm8a1;Tlk1;Traf6;Sft2d2;Zdhhc24;Arfgef1;Ruvbl2;Vps37c;Hyal2
GO:0051726	regulation of cell cycle	http://amigo.geneontology.org/amigo/term/GO:0051726	918	28	12.9175	2.1676	0.00010481	0.0284454	Pdpn;Eif4g3;Trp53inp1;Camk2n1;Cdkl2;Jund;Cdc42;Zwint;Ppp2ca;Mfn2;Lats2;Prkaca;Thoc1;Ercc3;Ppp2r1a;Btg3;Atrx;Pik3r4;Ccne2;Becn1;Parp3;Uimc1;Nek1;Ptprk;Mov10l1;Prpf40a;Ccpg1;Anapc4
